1 Mutation of influenza A virus PA-X decreases pathogenicity in chicken embryos and can  
2 increase the yield of reassortant candidate vaccine viruses

3

4 Saira Hussain<sup>a\*</sup>, Matthew L. Turnbull<sup>a†</sup>, Helen M. Wise<sup>a‡</sup>, Brett W. Jagger<sup>b,c§</sup>, Philippa M.  
5 Beard<sup>a,d</sup>, Kristina Kovacikova<sup>a□</sup>, Jeffery K. Taubenberger<sup>c</sup>, Lonneke Vervelde<sup>a</sup>, Othmar G  
6 Engelhardt<sup>e</sup> & Paul Digard<sup>a\*</sup>

7

8 <sup>a</sup>The Roslin Institute & Royal (Dick) School of Veterinary Studies, University of Edinburgh,  
9 Edinburgh, UK

10 <sup>b</sup>Department of Pathology, University of Cambridge, Cambridge, UK

11 <sup>c</sup>National Institutes of Health, Maryland, USA

12 <sup>d</sup>The Pirbright Institute, Pirbright, Surrey, UK

13 <sup>e</sup>National Institute for Biological Standards and Control, South Mimms, Hertfordshire, UK

14

15 Running Head: Influenza A virus PA-X and pathogenicity in hens' eggs

16

17 #Address correspondence to Paul Digard, paul.digard@roslin.ed.ac.uk

18 Present addresses: \*Saira Hussain, The Francis Crick Institute, London, United Kingdom;

19 †Matthew L Turnbull, Glasgow Centre for Virus Research, Glasgow, United Kingdom;

20 ‡Helen M. Wise, Herriot-Watt University, Edinburgh, United Kingdom; §Brett W. Jagger,

21 Department of Medicine, Washington University in St. Louis, St. Louis, USA; □ Kristina

22 Kovacikova, Leiden University Medical Centre, Netherlands.

23

24 Abstract word count: 242

25 Main text word count: 5308

26 **Abstract**

27

28 The PA-X protein of influenza A virus has roles in host cell shut-off and viral pathogenesis.  
29 While most strains are predicted to encode PA-X, strain-dependent variations in activity have  
30 been noted. We found that PA-X protein from A/PR/8/34 (PR8) strain had significantly lower  
31 repressive activity against cellular gene expression compared with PA-Xs from the avian  
32 strains A/turkey/England/50-92/91 (H5N1) (T/E) and A/chicken/Rostock/34 (H7N1). Loss of  
33 normal PA-X expression, either by mutation of the frameshift site or by truncating the X-  
34 ORF, had little effect on the infectious virus titre of PR8 or PR8 7:1 reassortants with T/E  
35 segment 3 grown in embryonated hens' eggs. However, in both virus backgrounds, mutation  
36 of PA-X led to decreased embryo mortality and lower overall pathology; effects that were  
37 more pronounced in the PR8 strain than the T/E reassortant, despite the low shut-off activity  
38 of the PR8 PA-X. Purified PA-X mutant virus particles displayed an increased ratio of HA to  
39 NP and M1 compared to their WT counterparts, suggesting altered virion composition. When  
40 the PA-X gene was mutated in the background of poorly growing PR8 6:2 vaccine  
41 reassortant analogues containing the HA and NA segments from H1N1 2009 pandemic  
42 viruses or an avian H7N3 strain, HA yield increased up to 2-fold. This suggests that the PR8  
43 PA-X protein may harbour a function unrelated to host cell shut-off and that disruption of the  
44 PA-X gene has the potential to improve the HA yield of vaccine viruses.

45

46 **IMPORTANCE** Influenza A virus is a widespread pathogen that affects both man and a  
47 variety of animal species, causing regular epidemics and sporadic pandemics with major  
48 public health and economic consequences. A better understanding of virus biology is  
49 therefore important. The primary control measure is vaccination, which for humans, mostly  
50 relies on antigens produced in eggs from PR8-based viruses bearing the glycoprotein genes of

51 interest. However, not all reassortants replicate well enough to supply sufficient virus antigen  
52 for demand. The significance of our research lies in identifying that mutation of the PA-X  
53 gene in the PR8 strain of virus can improve antigen yield, potentially by decreasing the  
54 pathogenicity of the virus in embryonated eggs.

55

## 56 **Introduction**

57

58 Influenza epidemics occur most years as the viruses undergo antigenic drift. Influenza  
59 A viruses (IAV) and influenza B viruses cause seasonal human influenza but IAV poses an  
60 additional risk of zoonotic infection, with the potential of a host switch and the generation of  
61 pandemic influenza. The 1918 ‘Spanish flu’ pandemic was by far the worst, resulting in 40-  
62 100 million deaths worldwide (1), while the 2009 swine flu pandemic caused an estimated  
63 200,000 deaths worldwide (2).

64 IAV contains eight genomic segments encoding for at least ten proteins. Six genomic  
65 segments (segments 1, 2, 3, 5, 7 and 8) encode the eight core “internal” proteins PB2, PB1,  
66 PA, NP, M1, NS1 and NS2, as well as the ion channel M2. These segments can also encode a  
67 variety of accessory proteins known to influence pathogenesis and virulence (reviewed in (3,  
68 4)). Segments 4 and 6 encode for the two surface glycoproteins haemagglutinin (HA) and  
69 neuraminidase (NA) respectively (5, 6) and virus strains are divided into subtypes according  
70 to the antigenicity of these proteins.

71 Vaccination is the primary public health measure to reduce the impact of influenza  
72 epidemics and pandemics, principally using inactivated viruses chosen to antigenically match  
73 the currently circulating virus strains or newly emerging viruses of pandemic concern.  
74 However, before efficient vaccine production can commence, high-yielding candidate  
75 vaccine viruses (CVVs) need to be prepared. Seasonal CVVs are widely produced by

76 classical reassortment. This process involves co-infecting embryonated hens' eggs with the  
77 vaccine virus along with a high yielding "donor" virus adapted to growth in eggs (most  
78 commonly the A/Puerto Rico/8/34 strain, or "PR8"). The highest yielding viruses that contain  
79 the glycoproteins of the vaccine virus are then selected. Recombinant influenza viruses are  
80 also made by reverse genetics (RG) (7-9), which relies on the transfection of cells with  
81 plasmids engineered to express both viral genomic RNA and proteins from each of the eight  
82 segments and hence initiate virus production; the resultant virus is subsequently amplified in  
83 eggs. When making RG CVVs, typically the six segments encoding core proteins (backbone)  
84 are derived from the donor strain whereas the two segments encoding the antigens are  
85 derived from the vaccine virus. Classical reassortment has the advantage that it allows for the  
86 fittest natural variant to be selected but it can be time consuming. In the case of a pandemic,  
87 large quantities of vaccine must be made available quickly. Moreover, RG is the only viable  
88 method for production of CVVs for potentially pandemic highly pathogenic avian influenza  
89 viruses, since it allows for removal of genetic determinants of high pathogenicity in the virus  
90 genome, as vaccines are manufactured in biosafety level 2 laboratories. A limited number of  
91 donor strains for IAV vaccine manufacture currently exist. Although PR8 is widely used,  
92 reassortant viruses based on it do not always grow sufficiently well for efficient vaccine  
93 manufacture. In the case of the 2009 H1N1 pandemic (pdm09), vaccine viruses grew poorly  
94 in eggs compared with those for previous seasonal H1N1 isolates (10), resulting in  
95 manufacturers struggling to meet demand. Thus, there is a clear need for new reagents and  
96 methods for IAV production, particularly for pandemic response.

97 In recent years, several approaches have been employed to improve antigen yield of  
98 candidate vaccine viruses made by reverse genetics. These have involved empirical testing  
99 and selection of PR8 variants (11, 12), as well as targeted approaches such as making  
100 chimeric genes containing promoter and packaging signal regions of PR8 while encoding the

101 ectodomain of the CVV glycoprotein genes (13-21), or introducing a wild-type (WT) virus-  
102 derived segment 2 (21-29). Our approach was to manipulate expression of an accessory  
103 protein virulence factor, PA-X (30). Segment 3, encoding PA as the primary gene product,  
104 also expresses PA-X by low-level ribosomal shifting into a +1 open reading frame (ORF)  
105 termed the X ORF (Fig 1A) (30). PA-X is a 29 kDa protein that contains the N-terminal  
106 endonuclease domain of PA, and in most isolates, a 61 amino acid C-terminus from the X  
107 ORF (30-32). It has roles in shutting off host cell protein synthesis and, at the whole animal  
108 level, modulating the immune response (30, 33). Loss of PA-X expression has been shown to  
109 be associated with increased virulence in mice for 1918 H1N1, H5N1 and also pdm09 and  
110 classical swine influenza H1N1 strains, as well as in chickens and ducks infected with a  
111 highly pathogenic H5N1 virus (30, 34-40). However, in other circumstances, such as avian  
112 H9N2 viruses (40) or, in some cases, A(H1N1)pdm09 viruses (37, 41), mutation of PA-X  
113 resulted in reduced pathogenicity in mice. Similarly, a swine influenza H1N2 virus (42)  
114 lacking PA-X showed reduced pathogenicity in pigs. Moreover, PA-X activity in repressing  
115 cellular gene expression is strain dependent (33, 34, 40, 43), with laboratory-adapted viruses  
116 such as A/WSN/33 showing lower levels of activity (33). Here, we show that although the  
117 PR8 PA-X polypeptide has low shut-off activity, removing its expression decreases the  
118 pathogenicity of the virus in the chick embryo model. Moreover, we found that, for certain  
119 poor growing CVV mimics, ablating PA-X expression improved HA yield from embryonated  
120 eggs up to 2-fold. In no case did loss of PA-X appear to be detrimental to the growth of  
121 CVVs, making it a potential candidate mutation for incorporation into the PR8 CVV donor  
122 backbone.

123

## 124 **Results**

125

126 **The PR8 virus strain PA-X has relatively low shut-off activity.**

127 Previous work has noted variation in apparent activity of PA-X proteins from  
128 different strains of virus, with the laboratory adapted-strain WSN showing lower activity than  
129 many other strains (33). Re-examination of evidence concerning a postulated proteolytic  
130 activity of PA (43) suggested that lower PA-X activity might also be a feature of the PR8  
131 strain. To test this, the ability of PR8 segment 3 gene products to inhibit cellular gene  
132 expression was compared to that of two avian virus-derived PA segments (from  
133 A/chicken/Rostock/34 [H7N1; FPV] and A/turkey/England/50-92/91 [H5N1; T/E]. Avian  
134 QT-35 (Japanese quail fibrosarcoma) cells were transfected with a consistent amount of a  
135 plasmid encoding luciferase under the control of a constitutive RNA polymerase II promoter  
136 (pRL) and increasing amounts of the IAV cDNAs (in pHW2000-based RG plasmids), or as a  
137 negative control, the maximum amount of the empty pHW2000 vector. Luciferase expression  
138 was measured 48 h later and expressed as a % of the amount obtained from pRL-only  
139 transfections. Transfection of a 4-fold excess of empty pHW2000 vector over the luciferase  
140 reporter plasmid had no significant effect on luciferase expression, whereas co-transfection of  
141 the same amount of either the FPV or T/E segments suppressed activity to around 10% of the  
142 control (Fig 1B). Titration of the FPV and T/E plasmids gave a clear dose-response  
143 relationship, giving estimated EC<sub>50</sub> values of 24 ± 1.1 ng and 32 ± 1.1 ng respectively. In  
144 contrast, the maximum amount of the PR8 plasmid only inhibited luciferase expression by  
145 around 30% and an EC<sub>50</sub> value could not be calculated, indicating a lower ability to repress  
146 cellular gene expression. Similarly low inhibitory activity of the PR8 segment 3 was seen in a  
147 variety of other mammalian cell lines (data not shown), suggesting it was an intrinsic feature  
148 of the viral gene, rather than a host- or cell type-specific outcome.

149 Several studies have shown the X-ORF to be important in host cell shut-off function  
150 and virulence of PA-X (37, 44-46). To further explore the influence of X-ORF sequences on

151 virus strain-specific host cell shut-off, mutations were constructed in segment 3 in which PA-  
152 X expression was either hindered (*via* mutation of the frameshift site [FS]) or altered by the  
153 insertion of premature termination codons (PTCs 1-4; silent in the PA ORF) such that C-  
154 terminally truncated forms of PA-X would be expressed (Figure 1A). QT-35 cells were co-  
155 transfected with the pRL plasmid and a fixed amount of WT, FS or PTC plasmids and  
156 luciferase expression measured 48 h later. As before, the WT FPV and T/E PA-Xs reduced  
157 luciferase activity by approximately 5-10 fold, while WT PR8 PA-X had no significant effect  
158 (Figure 1C). Introducing the FS mutation into both PR8 and T/E segment 3 significantly  
159 increased luciferase activity relative to the WT construct. Truncation of the PR8 PA-X to 225  
160 AA or less (PTC mutations 1-3) significantly improved shut-off activity, although not to the  
161 levels seen with the WT avian virus polypeptides, while the PTC4 truncation had no effect. In  
162 contrast, none of the PTC mutations significantly affected activity of the T/E PA-X, although  
163 there was a trend towards increased activity from the PTC2, 3 and 4 truncations

164         Low activity could be due to decreased expression and/or decreased activity of PA-X.  
165 To examine this, expression of the low activity PR8 and high activity FPV PA-X constructs  
166 were compared by *in vitro* translation reactions in rabbit reticulocyte lysate. Translation of  
167 segment 3 from both PR8 and FPV produced both full length PA and similar quantities of a  
168 minor polypeptide species of the expected size for PA-X whose abundance decreased after  
169 addition of the FS mutation or whose electrophoretic mobility was altered in stepwise fashion  
170 after C-terminal truncation with the PTC1-4 mutations (Figure 1D). This suggested that  
171 differences in shut-off potential were not linked to intrinsic differences in PA-X protein  
172 synthesis. To confirm the identity of the PR8 *in vitro* translated polypeptides,  
173 immunoprecipitation of IVT products with sera raised either against the N-terminal domain  
174 of PA, or an X-ORF derived polypeptide or pre-immune sera (30) were performed (Figure  
175 1E). WT PA-X was clearly visible in samples immunoprecipitated with anti-PA-X and anti-

176 PA-N but not the pre-immune serum, where it co-migrated with the product from the  
177 delC598 plasmid, a construct in which cytosine 598 of segment 3 (the nucleotide skipped  
178 during the PA-X frameshifting event (47)) had been deleted to put the X-ORF into the same  
179 reading frame as the N-terminal PA domain (Figure 1E, lanes 2 and 7). In contrast, only  
180 background amounts of protein were precipitated from the FS IVT (lane 3). Faster migrating  
181 polypeptide products from the PTC3 and 4 plasmids showed similar reactivities to WT PA-X  
182 (lanes 5 and 6) whereas the product of the PTC1 plasmid was only precipitated by anti-PA-N  
183 (lane 4), as expected because of the loss of the epitope used to raise the PA-X antiserum  
184 (Figure 1A). Overall therefore, the PR8 PA-X polypeptide possessed lower shut-off activity  
185 than two avian virus PA-X polypeptides despite comparable expression *in vitro*, and its  
186 activity could be modulated by mutation of the X-ORF.

187

188 **Loss of PA-X expression results in significantly less pathogenicity in chick embryos**  
189 **without affecting virus replication**

190

191 In order to further characterise the role of PA-X as a virulence determinant, we tested  
192 the panel of high and low activity mutants in the chicken embryo pathogenicity model.  
193 Embryonated hens' eggs were infected with PR8-based viruses containing either PR8 or T/E  
194 WT or mutant segment 3s and embryo viability was monitored at 2 days post infection (p.i.)  
195 by candling. Both WT PR8 and the WT 7:1 reassortant with the T/E segment 3 viruses had  
196 killed over 50% of the embryos by this point (Figures 2A and B). Truncation of PA-X by the  
197 PTC mutations led to small improvements in embryo survival, although none of the  
198 differences were statistically significant. However, embryo lethality was significantly  
199 reduced to below 20% following infection with the PR8 FS virus compared with PR8 WT  
200 virus. A similar reduction in lethality was seen for the T/E FS virus, although the difference



201 was not statistically significant. This reduction in embryo pathogenicity following ablation of  
202 PA-X expression suggested potential utility as a targeted mutation in the PR8 backbone used  
203 to make CVVs. Accordingly, to characterise the effects of mutating PR8 PA-X over the  
204 period used for vaccine manufacture, embryo survival was monitored daily for 72 h. Eggs  
205 infected with WT PR8 showed 45% embryo survival at 2 days p.i. and all were dead by day 3  
206 (Figure 2C). However, the PR8 FS infected eggs showed a statistically significant  
207 improvement in survival compared to WT, with 80% and 30% survival at days 2 and 3,  
208 respectively. Embryos infected with PR8 expressing the C-terminally truncated PTC1 form  
209 of PA-X showed an intermediate survival phenotype with 60% and 20% survival at days 2  
210 and 3, respectively.

211 To further assess the effects of mutating PA-X, the chicken embryos were examined  
212 for gross pathology. WT PR8 infection resulted in smaller, more fragile embryos with diffuse  
213 reddening, interpreted as haemorrhages (Figure 2D). In comparison, the PA-X null FS  
214 mutant-infected embryos remained intact, were visibly larger and less red. To quantitate these  
215 observations, embryos were scored blind for gross pathology. Taking uninfected embryos as  
216 a baseline, it was clear that WT PR8 virus as well as the PA-X truncation mutants induced  
217 severe changes to the embryos (Figure 2E). In contrast, the PA-X null FS mutant caused  
218 significantly less pathology. The WT 7:1 T/E reassortant virus gave less overt pathology than  
219 WT PR8 but again, reducing PA-X expression through the FS mutation further reduced  
220 damage to the embryos (Figure 2E). Similar trends in pathology were also seen with 7:1 PR8  
221 reassortant viruses containing either WT or FS mutant versions of FPV segment 3 (data not  
222 shown).

223 Examination of haematoxylin and eosin (H&E) stained sections through the embryos  
224 revealed pathology in numerous organs including the brain, liver and kidney (Figure 3). In  
225 the brain of embryos infected with WT virus there was marked rarefaction of the neuropil,

226 few neurons were identifiable, and there was accumulation of red blood cells (Figure 3C). In  
227 the liver of embryos infected with WT virus the hepatic cords were disorganised, and the  
228 hepatocytes were often separated by large pools of red blood cells (Figure 3D). In the kidney  
229 of embryos infected with WT virus, tubules were often lined by degenerate epithelial cells  
230 (characterised by loss of cellular detail). In all cases the pathology noted in WT virus-infected  
231 embryos was also present in the FS virus-infected embryos but at a reduced severity. Thus  
232 overall, disruption of PA-X expression in PR8 resulted in significantly less pathogenicity in  
233 chick embryos.

234 Reduced pathogenicity *in vivo* following loss of PA-X expression could be due to a  
235 replication deficiency of the virus, although the viruses replicated equivalently in mammalian  
236 MDCK cells (data not shown). To test if replication did differ *in ovo*, infectious virus titres  
237 were obtained (by plaque titration on MDCK cells) from the allantoic fluid of embryonated  
238 hens' eggs infected with the panels of PR8 and T/E viruses at 2 days p.i.. However, there  
239 were no significant differences in titres between either PR8 or T/E WT and PA-X mutant  
240 viruses (Figures 4A, B). Since the reduced pathogenicity phenotype *in ovo* on loss of PA-X  
241 expression was more pronounced for viruses with PR8 segment 3 than the T/E gene, embryos  
242 from PR8 WT and segment 3 mutant-infected eggs were harvested at 2 days p.i., washed,  
243 macerated and virus titres from the homogenates determined. Titres from embryos infected  
244 with the PR8 FS and PTC4 viruses were slightly (less than 2-fold) reduced compared to  
245 embryos infected with PR8 WT virus (Figure 4C), but overall there were no significant  
246 differences in titres between the viruses. To see if there were differences in virus localisation  
247 in tissues between PR8 WT and FS viruses, immunohistochemistry was performed on chick  
248 embryo sections to detect viral NP as a marker of infected cells. NP positive cells were seen  
249 in blood vessels throughout the head and body of both PR8 WT and FS-infected embryos;  
250 liver, heart and kidney are shown as representatives (Figure 4D), indicating that the

251 circulatory system had been infected. However, there were no clear differences in virus  
252 localisation between embryos infected with WT and FS viruses.

253 Overall therefore, the loss of PA-X expression reduced IAV pathogenicity in chick  
254 embryos, as assessed by mortality curves and both gross and histopathological examination  
255 of embryo bodies. This reduced pathogenicity did not appear to correlate with reduced  
256 replication or altered distribution of the virus *in ovo*.

257

### 258 **Ablating PA-X expression alters virion composition**

259 Other viruses encode host-control proteins with mRNA endonuclease activity,  
260 including the SOX protein of murine gammaherpesvirus MHV68 whose expression has been  
261 shown to also modulate virion composition (48). Also, egg-grown IAV titre and HA yield do  
262 not always exactly match, with certain problematic candidate vaccine viruses (CVVs)  
263 containing lower amounts of HA per virion (16, 49, 50). Accordingly, we compared the  
264 relative quantities of virion structural proteins between PA-X expressing and PA-X null  
265 viruses. Two pairs of viruses were tested: either an entirely PR8-based virus, or a 7:1  
266 reassortant of PR8 with FPV segment 3, both with or without the FS mutation. Viruses were  
267 grown in eggs as before and purified from allantoic fluid by density gradient  
268 ultracentrifugation before polypeptides were separated by SDS-PAGE and visualised by  
269 staining with Coomassie blue. To ensure that overall differences in protein loading did not  
270 bias the results, 3-fold dilutions of the samples were analysed. From the gels, the major virion  
271 components of both WT and FS virus preparations could be distinguished: NP, the two  
272 cleaved forms of haemagglutinin, HA1 and HA2, the matrix protein, M1 and in lower  
273 abundance, the polymerase proteins (Figures 5A, B, lanes 4-9). In contrast, only trace  
274 polypeptides were present in similarly purified samples from uninfected allantoic fluid (lanes  
275 1-3). Densitometry was used to assess the relative viral protein contents of the viruses. The

276 two most heavily loaded lanes (where band intensities were sufficient for accurate  
277 measurement) were quantified and average HA1:NP and HA2:M1 ratios calculated. When  
278 the data from three independent experiments were examined in aggregate by scatter plot  
279 (Figures 5C and D), a statistically significant increase in the average quantity of HA1 relative  
280 to NP was evident for both PR8 and the FPV reassortant FS viruses of ~1.4-fold and ~1.6-  
281 fold respectively compared to WT (Figures 5 C, D). The ratio of HA2:M1 was also  
282 significantly increased in the PR8 FS virus (~1.2- fold greater for WT) and a similar but non-  
283 significant increase was seen for the FPV virus pair. These data are consistent with the  
284 hypothesis that PA-X expression modulates virion composition.

285

## 286 **Ablating PA-X expression increases HA yield of CVVs bearing pdm2009** 287 **glycoproteins**

288 The reduced pathogenicity and corresponding longer embryo survival time induced  
289 by the PR8 FS mutant *in ovo* coupled with evident modulation of virion composition in  
290 favour of HA content suggested a strategy to increase overall antigen yields for PR8-based  
291 CVVs. Therefore, the effect of incorporating the PA-X FS mutation into CVV mimics  
292 containing glycoproteins of different IAV subtypes was examined. Reasoning that a benefit  
293 might be most apparent for a poor-yielding strain, 6:2 CVV mimics containing the  
294 glycoprotein genes from the A(H1N1)pdm09 vaccine strain, A/California/07/2009 (Cal7)  
295 with the six internal genes from PR8, with or without the FS mutation in segment 3, were  
296 generated. Growth of these viruses in embryonated hens' eggs was then assessed by  
297 inoculating eggs with either 100, 1,000 or 10,000 PFU per egg (modelling the empirical  
298 approach used in vaccine manufacture to find the optimal inoculation dose) and measuring  
299 HA titre at 3 days p.i.. Both viruses grew best at an inoculation dose of 100 PFU/egg, but  
300 final yield was both relatively low (as expected, ~ 64 HAU/50 µl) and insensitive to input

301 dose, with average titres varying less than 2-fold across the 100-fold range of inocula (Figure  
302 6A). However, at each dose, the 6:2 FS virus gave a higher titre (on average, 1.6-fold) than  
303 the parental 6:2 reassortant. In order to assess HA yield between the WT and FS viruses on a  
304 larger scale, comparable to that used by WHO Essential Regulatory Laboratories (ERLs)  
305 such as the National Institute for Biological Standards and Control, UK, 20 eggs per virus  
306 were infected at a single inoculation dose. In this experiment, the average HA titre of the FS  
307 virus was over 3 times higher than the WT 6:2 virus (Figure 6B). To further determine the  
308 consistency of these results, HA titre yields were assessed from two independently rescued  
309 reverse genetics stocks of the Cal7 6:2 CVV mimics with or without the PR8 PA-X gene as  
310 well as another 6:2 CVV mimic bearing the glycoproteins from the A/England/195/2009  
311 (Eng195) A(H1N1)pdm09 strain. HA yield from different stocks was assessed in independent  
312 repeats of both small- (5 eggs for each of three different inoculation doses, taking data from  
313 the dose that gave maximum yield) and large-scale (20 eggs per single dose of virus)  
314 experiments. Examination of the average HA titres showed considerable variation between  
315 independent experiments (Figure 6C). However, when plotted as paired data points, it was  
316 obvious that in every experiment, the FS viruses gave a higher yield than the parental 6:2  
317 reassortant and on average, there were 2.7- and 3.8-fold higher HA titres with the segment 3  
318 FS mutation for Cal7 and Eng195 respectively (Table 1).

319 To directly assess HA protein yield, viruses were partially purified by  
320 ultracentrifugation of pooled allantoic fluid through 30% sucrose cushions. Protein content  
321 was analysed by SDS-PAGE and Coomassie staining, either before or after treatment with N-  
322 glycosidase F (PNGaseF) to remove glycosylation from HA and NA. Both virus preparations  
323 gave polypeptide profiles that were clearly different from uninfected allantoic fluid processed  
324 in parallel, with obvious NP and M1 staining, as well other polypeptide species of less certain  
325 origin (Figure 6D). Overall protein recovery was higher in the FS virus than the WT

326 reassortant virus (compare lanes 3 and 4 with 5 and 6), but the poor yields of these viruses  
327 made unambiguous identification of the HA polypeptide difficult. However, PNGaseF  
328 treatment led to the appearance of a defined protein band migrating at around 40 kDa that  
329 probably represented de-glycosylated HA1, and this was present in appreciably higher  
330 quantities in the 6:2 FS preparation (compare lanes 4 and 6). Therefore, equivalent amounts  
331 of glycosylated or de-glycosylated samples from the Cal7 WT and FS reassortants were  
332 analysed by SDS-PAGE and western blotting using anti-pdm09 HA sera. The western blot  
333 gave a clear readout for HA1 content, confirmed the mobility shift upon de-glycosylation and  
334 showed increased amounts of HA1 in the 6:2 FS samples (Figure 6D lower panel).  
335 Quantitative measurements of the de-glycosylated samples showed that the 6:2 FS virus gave  
336 1.9-fold greater HA1 yield than the WT reassortant. To test the reproducibility of this finding,  
337 HA1 yield was assessed by densitometry of de-glycosylated HA1 following SDS-PAGE and  
338 western blot for partially purified virus from 9 independent experiments with the Cal7 and  
339 Eng195 reassortants. When examined as paired observations, it was evident that in 8 of the 9  
340 experiments, the FS viruses gave greater HA yields than the parental virus, with only one  
341 experiment producing a lower amount (Figure 6E). In one large-scale experiment, the HA1  
342 yield of 6:2 FS was approximately 20-fold higher compared to its 6:2 counterpart. However,  
343 in all other experiments, the 6:2 FS virus gave between 1.5 and 3-fold increases in HA1 yield  
344 when compared with the 6:2 virus. When the outlier was discounted (as possibly resulting  
345 from an artefactually low recovery for the WT sample), average HA1 yield from the other 8  
346 experiments showed 1.9- and 2.4-fold improvements with the segment 3 FS mutation for  
347 Cal7 and Eng195 respectively (Table 1).

348         The HA yield of CVVs with pdm09 glycoproteins has been shown to be improved by  
349 engineering chimeric HA genes which contain signal peptide and transmembrane  
350 domain/cytoplasmic tail sequences from PR8 HA and the antigenic region of the HA gene

351 from Cal7 (19, 20). To test if these gains were additive with those seen with the FS mutation,  
352 we introduced the NIBRG-119 construct, which is a segment 4 with the ectodomain coding  
353 region of Cal7 HA and all other sequences (3'- and 5'-noncoding regions, signal peptide,  
354 transmembrane domain, and cytoplasmic tail) from PR8 (19) into 6:2 CVV mimics with the  
355 WT A(H1N1)pdm09 NA gene and a PR8 backbone with or without the PA-X mutation.  
356 Viruses bearing the NIBRG-119 HA did not agglutinate chicken red blood cells (data not  
357 shown) so HA yield from eggs was assessed by SDS-PAGE and western blot of partially  
358 purified virus. Chimeric HA viruses containing the FS backbone showed an average HA  
359 yield improvement of 1.54-fold compared to the WT backbone counterpart, across  
360 independent small- and large-scale experiments (Table 1). Thus, the FS mutation is  
361 compatible with other rational strategies for increasing egg-grown reverse genetics vaccines.

362         Following on from this, several pairs of CVV mimics were made with glycoproteins  
363 from different IAV strains with either WT or FS mutant PR8 segment 3. These included  
364 viruses with glycoproteins of potentially pandemic strains such as highly pathogenic avian  
365 virus A/turkey/Turkey/1/2005 (H5N1), as well as low pathogenic avian strains  
366 A/mallard/Netherlands/12/2000 (H7N3), A/chicken/Pakistan/UDL-01/2008 (H9N2) and  
367 A/mallard/Netherlands/10/99 (H1N1), as well as the human H3N2 strain, A/Hong Kong/1/68,  
368 and an early seasonal H3N2 isolate, A/Udorn/307/72 (Table 1). HA yield in eggs was  
369 assessed from both the small-scale and large-scale experimental conditions described earlier,  
370 by measuring HA titre and HA1 yield from partially purified virus particles. In general, the  
371 two techniques were in agreement (Table 1). Ablating PA-X expression moderately improved  
372 HA1 yields of some of the CVVs tested: 1.5-fold for the avian H7N3 strain,  
373 A/mallard/Netherlands/12/2000 and 1.3-fold for the human H3N2 A/Udorn/307/72 strain.  
374 Other CVVs showed lesser or effectively no increases. However, in no case, did ablation of  
375 PA-X appear to be detrimental to the growth of CVVs.

376

## 377 **Discussion**

378         Here we show that ablating expression of PA-X resulted in reduced pathogenicity in  
379 the chicken embryo model despite the PR8 PA-X protein having relatively low host cell shut-  
380 off activity compared to PA-X from other IAV strains. Although loss of PA-X expression had  
381 no effect on infectious titres in eggs, subtle differences in virion composition were observed,  
382 and more importantly, the HA yield from poor growing 6:2 reassortant vaccine analogues  
383 containing the HA and NA segments from A(H1N1) pdm09 strains was significantly  
384 improved.

385         The majority of studies examining the effect of loss of PA-X expression on IAV  
386 pathogenicity have used mice as the experimental system. As discussed above, in most cases,  
387 the outcome has been increased virulence (30, 34-40), but several studies have found the  
388 opposite effect, with PA-X deficiency reducing pathogenicity in mice (37, 41, 42). In adult  
389 bird challenge systems using chickens and ducks infected with a highly pathogenic H5N1  
390 virus, abrogating PA-X expression caused increased virulence (35). In our infection model of  
391 embryonated hens' eggs, loss of PA-X expression markedly reduced the pathogenicity in  
392 chick embryos. Thus like PB1-F2, another *trans*-frame encoded IAV accessory protein (51),  
393 the impact of PA-X expression on viral pathogenicity seems to vary according to both host  
394 and virus strain, but not in a fashion that can simply be correlated with mammalian or avian  
395 settings.

396         In previous studies, changes in virulence phenotypes following loss of PA-X  
397 expression have been associated with its host cell shut-off function. In the virus strains used,  
398 whether from high pathogenicity or low pathogenicity IAV strains, the PA-X polypeptides  
399 were shown to significantly affect host cell gene expression. Here, despite PR8 PA-X failing  
400 to repress cellular gene expression, a strong phenotypic effect was seen in chicken embryos



401 following loss of PA-X expression. Furthermore, these effects on pathogenicity were more  
402 pronounced in an otherwise WT PR8 virus than in a 7:1 reassortant with segment 3 from the  
403 highly pathogenic H5N1 avian influenza T/E strain which encodes a PA-X with strong host  
404 cell shut-off activity. This lack of correlation between repression of cellular gene expression  
405 in avian cells and phenotypic effects in chicken embryos suggests that the PR8 PA-X protein  
406 may harbour a function unrelated to host cell shut-off. The PR8 PA-X protein has been  
407 proposed to inhibit stress granule formation, but via a mechanism linked to its endonuclease  
408 activity and therefore presumably reflecting shut-off activity (52). Alternatively, it could be  
409 that the PR8 PA-X polypeptide only exhibits repressive function in specific cell types, such  
410 as those of the chorioallantoic membrane (the primary site of virus replication in eggs) or the  
411 chick embryo itself. However, since we found low shut-off activity from it in a variety of  
412 cells from different species and conversely, no great cell specificity of high activity PA-X  
413 polypeptides (data not shown), we do not favour this hypothesis.

414         Several studies have found that sequences in the X-ORF make positive contributions  
415 to the shut-off activity of PA-X (30, 37, 39, 45, 46). In contrast, here we found that for both  
416 PR8 and T/E strains of the polypeptide, removal of X-ORF sequences actually increased  
417 shut-off activity compared to the WT polypeptide. The effect was relatively modest and in  
418 the case of PR8, did not confer equivalent activity to the full-length avian virus PA-X  
419 polypeptides (Figure 1C). A similar outcome of greater inhibition from a truncated PA-X  
420 polypeptide was seen with a triple reassortant swine influenza virus (42), suggesting that the  
421 X-ORF can harbour negative as well as positive regulatory polymorphisms.

422         In some but not all studies, effects of PA-X mutations on viral pathogenicity have  
423 been associated with differences in virus replication *in vivo*. While Jagger et al., (30) did not  
424 attribute the increased virulence in mice upon loss of 1918 H1N1 PA-X to virus replication,  
425 Gao and colleagues found that increased virulence in mice on loss of H5N1 PA-X was

426 associated with increased titres of  $\Delta$ PA-X viruses in the lungs, brains and blood of infected  
427 mice (34, 39). Similarly, Hu et al. found that increased virulence in chicken, ducks and mice  
428 of a  $\Delta$ PA-X H5N1 virus was associated with increased virus titres in the host (35). Given the  
429 postulated role of PA-X-mediated repression of cellular gene expression in controlling host  
430 responses to infection, it is reasonable to hypothesise that these differing outcomes reflect the  
431 variable interplay between host and virus that is well known to tip in favour of one or other  
432 depending on exact circumstance (53). Our present study, where loss of a PA-X with little  
433 apparent ability to modulate host gene expression had no significant effect on virus titres in  
434 allantoic fluid or the chick embryos themselves, but nevertheless reduced pathogenicity, do  
435 not support this hypothesis. However, differences in progeny virion composition in the form  
436 of altered ratios of HA to NP and M1 between WT and FS viruses were seen. This may  
437 differentially affect their ability to infect specific cell types, as the amount of virus receptor  
438 varies between different tissue types and is a known determinant of tissue tropism of  
439 influenza viruses (reviewed in (54, 55)).

440 Our findings have direct implications for HA yield of vaccine viruses in eggs.  
441 Ablating PA-X expression did not affect yield from eggs of high growth viruses such as PR8  
442 or 6:2 reassortant CVV mimics containing glycoproteins of human H3N2 strains, or  
443 potentially pandemic low pathogenicity avian H9N2 or H1N1 viruses. However, mutation of  
444 the PR8 PA-X gene in the background of a CVV analogue containing the HA and NA  
445 segments from poor growing strains, such as A(H1N1)pdm09 viruses or a potentially  
446 pandemic avian H7N3 isolate, increased HA yield by around 2-fold. The mechanism of  
447 improved yield of certain virus subtypes but not others on loss of PA-X expression is unclear.  
448 Others have found that mutating the FS site of PR8 PA-X has subtle effects on viral protein  
449 expression *in vitro*, including lower levels of M1 (45), perhaps explaining the changes in HA  
450 to M1 ratio we see. Beneficial outcomes to HA yield may only be apparent in low-yielding

451 strains where perhaps viral rather than cellular factors are limiting. Alternatively, changes in  
452 virion composition between WT and FS viruses could result in subtype/strain-specific effects  
453 depending on the balance between HA and NA activities (56). Whatever the mechanism, in  
454 no case was loss of PA-X expression detrimental to yield of CVVs, when assessing HA yield  
455 of a wide range of different influenza A subtypes/strains. This approach of modifying the  
456 PR8 donor backbone therefore potentially supplies a ‘universal’ approach that can be applied  
457 to all CVVs that is additive with, but without the need for, generation and validation of,  
458 subtype/strain-specific constructs, as is required for strategies based on altering the  
459 glycoprotein genes. This could be beneficial to improve antigen yield in a pandemic setting  
460 where manufacturers are required to produce large amounts of vaccine quickly.

461

## 462 **Materials and methods**

463

### 464 **Cell lines and plasmids**

465 Human embryonic kidney (293T) cells, canine kidney Madin-Darby canine kidney epithelial  
466 cells (MDCK) and MDCK-SIAT1 (stably transfected with the cDNA of human 2,6-  
467 sialtransferase; (57)) cells were obtained from the Crick Worldwide Influenza Centre, The  
468 Francis Crick Institute, London. QT-35 (Japanese quail fibrosarcoma; (58)) cells were  
469 obtained from Dr Laurence Tiley, University of Cambridge. Cells were cultured in DMEM  
470 (Sigma) containing 10% (v/v) FBS, 100 U/mL penicillin/streptomycin and 100 U/mL  
471 GlutaMAX with 1 mg/ml Geneticin as a selection marker for the SIAT cells. Infection was  
472 carried out in serum-free DMEM containing 100 U/mL penicillin/streptomycin, 100 U/mL  
473 GlutaMAX and 0.14% (w/v) BSA. Cells were incubated at 37°C, 5% CO<sub>2</sub>. Reverse genetics  
474 plasmids were kindly provided by Professor Ron Fouchier (A/Puerto Rico/8/34; (59)),  
475 Professor Wendy Barclay (A/England/195/2009 (60) and A/turkey/England/50-92/91 (61)),

476 Dr John McCauley (A/California/07/2009; (62)), Dr Laurence Tiley  
477 (A/mallard/Netherlands/10/1999 (63)), Professor Robert Lamb (A/Udorn/307/72 (64)),  
478 Professor Earl Brown (A/Hong Kong/1/68 (65)) and Professor Munir Iqbal  
479 (A/chicken/Pakistan/UDL-01/2008 (66)). RG plasmids for A/mallard/Netherlands/12/2000  
480 (NIBRG-60) and A/turkey/Turkey/1/2005 (NIBRG-23; with the multi-basic cleavage site  
481 removed (67)) were made by amplifying HA and NA genes by PCR from cDNA clones  
482 available within NIBSC and cloning into pHW2000 vector using BsmB1 restriction sites. A  
483 plasmid containing the *Renilla* luciferase gene behind the simian virus 40 early promoter  
484 (pRL) was supplied by Promega Ltd.

485

#### 486 **Antibodies and sera**

487 Primary antibodies used were: rabbit polyclonal antibody anti-HA for swine H1 (Ab91641,  
488 AbCam), rabbit polyclonal anti-HA for H7N7 A/chicken/MD/MINHMA/2004 (IT-003-008,  
489 Immune Tech Ltd), mouse monoclonal anti-HA for H5N1 (8D2, Ab82455, AbCam),  
490 laboratory-made rabbit polyclonal anti-NP (2915) (68), anti-PA residues 16-213 (expressed  
491 as a fusion protein with  $\beta$ -galactosidase (69), anti-puromycin mouse monoclonal antibody  
492 (Millipore MABE343), rabbit anti-PR8 PA-X peptide (residues 211-225) antibody (30) and  
493 anti-tubulin- $\alpha$  rat monoclonal antibody (Serotec MCA77G). Secondary antibodies used were:  
494 for immunofluorescence, Alexa fluor donkey anti-rabbit IgG 488 or 594 conjugates  
495 (Invitrogen), for immunohistochemistry, goat anti-mouse horseradish peroxidase (Biorad  
496 172-1011) and goat anti-rabbit horseradish peroxidase (Biorad 172-1019), for western blot,  
497 donkey anti-rabbit IgG Dylight800 or Alexa fluor 680-conjugated donkey anti-mouse IgG  
498 (Licor Biosciences).

499

#### 500 **Site-directed mutagenesis**

501 The QuikChange® Lightning site-directed mutagenesis kit (Stratagene) was used according  
502 to the manufacturer's instructions. Primers used for site-directed mutagenesis of the segment  
503 3 gene were designed using the primer design tool from Agilent technologies. The strategies  
504 used to disrupt the frameshift site (FS) as well as generating C-terminally truncated versions  
505 of PA-X via PTCs were as described (30); the cited study used the PTC1 construct.

506

507

### 508 **Protein analyses**

509 Coupled *in vitro* transcription–translation reactions were carried out in rabbit reticulocyte  
510 lysate supplemented with <sup>35</sup>S-methionine using the Promega TNT system according to the  
511 manufacturer's instructions. SDS–PAGE followed by autoradiography was performed  
512 according to standard procedures. Immunoprecipitations were performed as previously  
513 described (70). Transfection-based reporter assays to assess host cell shut-off by PA-X  
514 (described previously (30)) were performed by co-transfecting QT-35 cells with a reporter  
515 plasmid containing the *Renilla* luciferase gene along with pHW2000 plasmids expressing the  
516 appropriate segment 3 genes with or without the desired PA-X mutations. 48 h post-  
517 transfection, cells were lysed and luciferase activity measured on a Promega GloMax 96-well  
518 Microplate luminometer using the Promega *Renilla* Luciferase system.

519

### 520 **Reverse genetics rescue of viruses**

521 All viruses used in this study were made by reverse genetics. 293T cells were transfected  
522 with eight pHW2000 plasmids each encoding one of the influenza segments using  
523 Lipofectamine™ 2000 (Invitrogen). Cells were incubated for 6 hours post-transfection before  
524 medium was replaced with DMEM serum-free virus growth medium. At 2 days post-  
525 transfection, 0.5 µg/ml TPCK trypsin (Sigma) was added to cells. Cell culture supernatants

526 were harvested at 3 days post-transfection. 293T cell culture supernatants were clarified and  
527 used to infect 10-11 day-old embryonated hens' eggs. At 3 days p.i., eggs were chilled over-  
528 night and virus stocks were partially sequenced to confirm identity.

529

### 530 **RNA extraction, RT-PCR and sequence analysis.**

531 Viral RNA extractions were performed using the QIAamp viral RNA mini kit with on-  
532 column DNase digestion (QIAGEN). Reverse transcription used the influenza A Uni12  
533 primer (AGCAAAAGCAGG) using a Verso cDNA kit (Thermo Scientific). PCR reactions  
534 were performed using Pfu Ultra II fusion 145 HS polymerase (Stratagene) or Taq Polymerase  
535 (Invitrogen) according to the manufacturers' protocols. PCR products were purified for  
536 sequencing by Illustra GFX PCR DNA and Gel Band Purification kit (GE Healthcare).  
537 Primers and purified DNA were sent to GATC biotech for Sanger sequencing (Lightrun  
538 method). Sequences were analysed using the DNASTar software.

539

### 540 **Virus titration**

541 Plaque assays, TCID<sub>50</sub> assays and haemagglutination assays were performed according to  
542 standard methods (71). MDCK or MDCK-SIAT cells were used for infectious virus titration,  
543 and infectious foci were visualised by either toluidine blue or immunostaining for influenza  
544 NP and visualising using a tetra-methyl benzidine (TMB) substrate.

545

### 546 **Virus purification and analysis**

547 Allantoic fluid was clarified by centrifugation twice at 6,500 x g for 10 mins. Virus was then  
548 partially purified by ultracentrifugation at 128,000 x g for 1.5 hours at 4°C through a 30%  
549 sucrose cushion. For further purification, virus pellets were resuspended in PBS, loaded onto  
550 15-60% sucrose/PBS density gradients and centrifuged at 210,000 x g for 40 mins at 4°C.

551 Virus bands were extracted from gradients and virus was pelleted by ultracentrifugation at  
552 128,000 x g for 1.5 hours at 4°C. Pellets were resuspended in PBS and aliquots treated with  
553 N-glycosidase F (New England Biolabs), according to the manufacturer's protocol. Virus  
554 pellets were lysed in Laemmli sample buffer and separated by SDS-PAGE on 10% or 12%  
555 polyacrylamide gels under reducing conditions. Protein bands were visualised by Coomassie  
556 blue staining (Imperial<sup>TM</sup> protein stain, Thermo Scientific) or detected by immunostaining in  
557 western blot. Coomassie stained gels were scanned and bands quantified using ImageJ  
558 software. Western blots were scanned on a Li-Cor Odyssey Infrared Imaging system v1.2  
559 after staining with the appropriate antibodies and bands were quantified using ImageStudio  
560 Lite software (Odyssey).

561

#### 562 **Chick embryo pathogenesis model**

563 Ten-day old embryonated hens' eggs were inoculated via the allantoic cavity route with 1000  
564 PFU in 100 µl per egg or mock (serum-free medium only) infected. Embryo viability was  
565 subsequently determined by examination of veins lining the shell (which collapse on death)  
566 and embryo movement (for a few minutes). At 2 - 3 days p.i. (depending on experiment),  
567 embryos were killed by chilling, washed several times in PBS and then scored blind for overt  
568 pathology by two observers in each experiment. Scores were 0 = normal, 1 = intact but with  
569 dispersed haemorrhages, 2 = small, fragile embryo with dispersed haemorrhages. For  
570 histology, embryos were decapitated, washed several times in PBS, imaged and fixed for  
571 several days in 4% formalin in PBS. Two embryos per virus condition were sectioned  
572 longitudinally and mounted onto paraffin wax. Tissue sections were cut and mounted onto  
573 slides and stained with haematoxylin and eosin (H&E) by the Easter Bush Pathology Service.  
574 Further sections were examined by immunohistofluorescence performed for influenza NP  
575 (62). Sections were deparaffinised and rehydrated and heat-induced antigen retrieval was

576 performed using sodium citrate buffer (10 mM sodium citrate, 0.05% Tween20, pH 6.0).  
577 Sections were stained with anti-NP antibody followed by an Alexa fluor-conjugated  
578 secondary antibody. Pre-immune bleed serum was also used to confirm specificity of staining  
579 by anti-NP antibody. Sections were mounted using ProLong Gold anti-fade reagent  
580 containing DAPI (Invitrogen). Stained tissue sections were scanned using a Nanozoomer XR  
581 (Hamamatsu) using brightfield or fluorescence settings. Images were analysed using the NDP  
582 view 2.3 software (Hamamatsu).

583

#### 584 **Graphs and statistical analyses**

585 All graphs were plotted and statistical analyses (Mantel-Cox test, t-tests and Dunnett's and  
586 Tukey's tests as part of one-way Anova) performed using Graphpad Prism software.

587

#### 588 **Acknowledgements**

589 We thank Dr. Francesco Gubinelli, Dr. Carolyn Nicolson and Dr. Ruth Harvey at the  
590 Influenza Resource Centre, National Institute for Biological Standards and Control, U. K for  
591 their support during experiments performed in their lab, and staff at the Easter Bush  
592 Pathology service for pathology support, Bob Fleming and Dr José Pereira for imaging  
593 assistance, and Dr. Liliane Chung and Dr. Marlynn Quigg-Nicol for technical advice.

594

#### 595 **Funding information**

596 This work was funded in part with Federal funds from the Office of the Assistant  
597 Secretary for Preparedness and Response, Biomedical Advanced Research and Development  
598 Authority, under Contract No. HHSO100201300005C (to OGE and PD), by a grant from UK  
599 Department of Health's Policy Research Programme (NIBSC Regulatory Science Research  
600 Unit), Grant Number 044/0069 (to OGE) and the Intramural Research Program of the



601 National Institute of Allergy and Infectious Diseases (DIR, NIAID) (to J.K.T.), as well as  
602 Institute Strategic Programme Grants (BB/J01446X/1 and BB/P013740/1) from the  
603 Biotechnology and Biological Sciences Research Council (BBSRC) to PD, PB, LV and  
604 HMW. BWJ, PD, and JKT are also thankful for the support of the NIH-Oxford-Cambridge  
605 Research Scholars program. The views expressed in the publication are those of the author(s)  
606 and not necessarily those of the NHS, the NIHR, the Department of Health, 'arms' length  
607 bodies or other government departments.

608

## 609 **References**

610

- 611 1. **Johnson NPAS, Mueller J.** 2002. Updating the Accounts: Global Mortality of the  
612 1918-1920 "Spanish" Influenza Pandemic. *Bulletin of the History of Medicine*  
613 **76**:105-115.
- 614 2. **Dawood FS, Iuliano AD, Reed C, Meltzer MI, Shay DK, Cheng P-Y,**  
615 **Bandaranayake D, Breiman RF, Brooks WA, Buchy P, Feikin DR, Fowler KB,**  
616 **Gordon A, Hien NT, Horby P, Huang QS, Katz MA, Krishnan A, Lal R,**  
617 **Montgomery JM, Mølbak K, Pebody R, Presanis AM, Razuri H, Steens A,**  
618 **Tinoco YO, Wallinga J, Yu H, Vong S, Bresee J, Widdowson M-A.** 2012.  
619 Estimated global mortality associated with the first 12 months of 2009 pandemic  
620 influenza A H1N1 virus circulation: a modelling study. *The Lancet Infectious*  
621 *Diseases* **12**:687-695.
- 622 3. **Khaperskyy DA, McCormick C.** 2015. Timing Is Everything: Coordinated Control  
623 of Host Shutoff by Influenza A Virus NS1 and PA-X Proteins. *J Virol* **89**:6528-6531.
- 624 4. **Vasin AV, Temkina OA, Egorov VV, Klotchenko SA, Plotnikova MA, Kiselev**  
625 **OI.** 2014. Molecular mechanisms enhancing the proteome of influenza A viruses: an  
626 overview of recently discovered proteins. *Virus Res* **185**:53-63.
- 627 5. **Palese P, Schulman JL.** 1976. Mapping of the influenza virus genome: identification  
628 of the hemagglutinin and the neuraminidase genes. *Proc Natl Acad Sci U S A*  
629 **73**:2142-2146.
- 630 6. **Ritchey MB, Palese P, Schulman JL.** 1976. Mapping of the influenza virus genome.  
631 III. Identification of genes coding for nucleoprotein, membrane protein, and  
632 nonstructural protein. *J Virol* **20**:307-313.
- 633 7. **Neumann G, Watanabe T, Ito H, Watanabe S, Goto H, Gao P, Hughes M, Perez**  
634 **DR, Donis R, Hoffmann E, Hobom G, Kawaoka Y.** 1999. Generation of influenza  
635 A viruses entirely from cloned cDNAs. *Proc Natl Acad Sci U S A* **96**:9345-9350.
- 636 8. **Hoffmann E, Neumann G, Kawaoka Y, Hobom G, Webster RG.** 2000. A DNA  
637 transfection system for generation of influenza A virus from eight plasmids. *Proc Natl*  
638 *Acad Sci U S A* **97**:6108-6113.
- 639 9. **Fodor E, Devenish L, Engelhardt OG, Palese P, Brownlee GG, Garcia-Sastre A.**  
640 1999. Rescue of influenza A virus from recombinant DNA. *J Virol* **73**:9679-9682.

- 641 10. **Robertson JS, Nicolson C, Harvey R, Johnson R, Major D, Guilfoyle K, Roseby**  
642 **S, Newman R, Collin R, Wallis C, Engelhardt OG, Wood JM, Le J, Manojkumar**  
643 **R, Pokorny BA, Silverman J, Devis R, Bucher D, Verity E, Agius C, Camuglia S,**  
644 **Ong C, Rockman S, Curtis A, Schoofs P, Zoueva O, Xie H, Li X, Lin Z, Ye Z,**  
645 **Chen LM, O'Neill E, Balish A, Lipatov AS, Guo Z, Isakova I, Davis CT,**  
646 **Rivailler P, Gustin KM, Belser JA, Maines TR, Tumpey TM, Xu X, Katz JM,**  
647 **Klimov A, Cox NJ, Donis RO.** 2011. The development of vaccine viruses against  
648 pandemic A(H1N1) influenza. *Vaccine* **29**:1836-1843.
- 649 11. **Johnson A, Chen LM, Winne E, Santana W, Metcalfe MG, Mateu-Petit G,**  
650 **Ridenour C, Hossain MJ, Villanueva J, Zaki SR, Williams TL, Cox NJ, Barr JR,**  
651 **Donis RO.** 2015. Identification of Influenza A/PR/8/34 Donor Viruses Imparting  
652 High Hemagglutinin Yields to Candidate Vaccine Viruses in Eggs. *PLoS One*  
653 **10**:e0128982.
- 654 12. **Ping J, Lopes TJ, Nidom CA, Ghedin E, Macken CA, Fitch A, Imai M, Maher**  
655 **EA, Neumann G, Kawaoka Y.** 2015. Development of high-yield influenza A virus  
656 vaccine viruses. *Nat Commun* **6**:8148.
- 657 13. **Barman S, Krylov PS, Turner JC, Franks J, Webster RG, Husain M, Webby RJ.**  
658 2017. Manipulation of neuraminidase packaging signals and hemagglutinin residues  
659 improves the growth of A/Anhui/1/2013 (H7N9) influenza vaccine virus yield in  
660 eggs. *Vaccine* **35**:1424-1430.
- 661 14. **Adamo JE, Liu T, Schmeisser F, Ye Z.** 2009. Optimizing viral protein yield of  
662 influenza virus strain A/Vietnam/1203/2004 by modification of the neuraminidase  
663 gene. *J Virol* **83**:4023-4029.
- 664 15. **Pan W, Dong Z, Meng W, Zhang W, Li T, Li C, Zhang B, Chen L.** 2012.  
665 Improvement of influenza vaccine strain A/Vietnam/1194/2004 (H5N1) growth with  
666 the neuraminidase packaging sequence from A/Puerto Rico/8/34. *Hum Vaccin*  
667 *Immunother* **8**:252-259.
- 668 16. **Jing X, Phy K, Li X, Ye Z.** 2012. Increased hemagglutinin content in a reassortant  
669 2009 pandemic H1N1 influenza virus with chimeric neuraminidase containing donor  
670 A/Puerto Rico/8/34 virus transmembrane and stalk domains. *Vaccine* **30**:4144-4152.
- 671 17. **Harvey R, Nicolson C, Johnson RE, Guilfoyle KA, Major DL, Robertson JS,**  
672 **Engelhardt OG.** 2010. Improved haemagglutinin antigen content in H5N1 candidate  
673 vaccine viruses with chimeric haemagglutinin molecules. *Vaccine* **28**:8008-8014.
- 674 18. **Harvey R, Johnson RE, MacLellan-Gibson K, Robertson JS, Engelhardt OG.**  
675 2014. A promoter mutation in the haemagglutinin segment of influenza A virus  
676 generates an effective candidate live attenuated vaccine. *Influenza Other Respir*  
677 *Viruses* **8**:605-612.
- 678 19. **Harvey R, Guilfoyle KA, Roseby S, Robertson JS, Engelhardt OG.** 2011.  
679 Improved antigen yield in pandemic H1N1 (2009) candidate vaccine viruses with  
680 chimeric hemagglutinin molecules. *J Virol* **85**:6086-6090.
- 681 20. **Medina J, Boukhebbza H, De Saint Jean A, Sodoyer R, Legastelois I, Moste C.**  
682 2015. Optimization of influenza A vaccine virus by reverse genetic using chimeric  
683 HA and NA genes with an extended PR8 backbone. *Vaccine* **33**:4221-4227.
- 684 21. **Plant EP, Ye Z.** 2015. Chimeric neuraminidase and mutant PB1 gene constellation  
685 improves growth and yield of H5N1 vaccine candidate virus. *J Gen Virol* **96**:752-755.
- 686 22. **Plant EP, Liu TM, Xie H, Ye Z.** 2012. Mutations to A/Puerto Rico/8/34 PB1 gene  
687 improves seasonal reassortant influenza A virus growth kinetics. *Vaccine* **31**:207-212.
- 688 23. **Cobbins JC, Verity EE, Gilbertson BP, Rockman SP, Brown LE.** 2013. The source  
689 of the PB1 gene in influenza vaccine reassortants selectively alters the hemagglutinin  
690 content of the resulting seed virus. *J Virol* **87**:5577-5585.

- 691 24. **Cobbin JC, Ong C, Verity E, Gilbertson BP, Rockman SP, Brown LE.** 2014.  
692 Influenza virus PB1 and neuraminidase gene segments can cosegregate during  
693 vaccine reassortment driven by interactions in the PB1 coding region. *J Virol*  
694 **88**:8971-8980.
- 695 25. **Wanitchang A, Kramyu J, Jongkaewwattana A.** 2010. Enhancement of reverse  
696 genetics-derived swine-origin H1N1 influenza virus seed vaccine growth by inclusion  
697 of indigenous polymerase PB1 protein. *Virus Res* **147**:145-148.
- 698 26. **Gomila RC, Suphaphiphat P, Judge C, Spencer T, Ferrari A, Wen Y, Palladino**  
699 **G, Dormitzer PR, Mason PW.** 2013. Improving influenza virus backbones by  
700 including terminal regions of MDCK-adapted strains on hemagglutinin and  
701 neuraminidase gene segments. *Vaccine* **31**:4736-4743.
- 702 27. **Giria M, Santos L, Louro J, Rebelo de Andrade H.** 2016. Reverse genetics vaccine  
703 seeds for influenza: Proof of concept in the source of PB1 as a determinant factor in  
704 virus growth and antigen yield. *Virology* **496**:21-27.
- 705 28. **Mostafa A, Kanrai P, Ziebuhr J, Pleschka S.** 2016. The PB1 segment of an  
706 influenza A virus H1N1 2009pdm isolate enhances the replication efficiency of  
707 specific influenza vaccine strains in cell culture and embryonated eggs. *J Gen Virol*  
708 **97**:620-631.
- 709 29. **Gilbertson B, Zheng T, Gerber M, Printz-Schweigert A, Ong C, Marquet R, Isel**  
710 **C, Rockman S, Brown L.** 2016. Influenza NA and PB1 Gene Segments Interact  
711 during the Formation of Viral Progeny: Localization of the Binding Region within the  
712 PB1 Gene. *Viruses* **8**:238.
- 713 30. **Jagger BW, Wise HM, Kash JC, Walters KA, Wills NM, Xiao YL, Dunfee RL,**  
714 **Schwartzman LM, Ozinsky A, Bell GL, Dalton RM, Lo A, Efstathiou S, Atkins**  
715 **JF, Firth AE, Taubenberger JK, Digard P.** 2012. An overlapping protein-coding  
716 region in influenza A virus segment 3 modulates the host response. *Science* **337**:199-  
717 204.
- 718 31. **Shi M, Jagger BW, Wise HM, Digard P, Holmes EC, Taubenberger JK.** 2012.  
719 Evolutionary conservation of the PA-X open reading frame in segment 3 of influenza  
720 A virus. *J Virol* **86**:12411-12413.
- 721 32. **Yewdell JW, Ince WL.** 2012. *Virology*. Frameshifting to PA-X influenza. *Science*  
722 **337**:164-165.
- 723 33. **Desmet EA, Bussey KA, Stone R, Takimoto T.** 2013. Identification of the N-  
724 terminal domain of the influenza virus PA responsible for the suppression of host  
725 protein synthesis. *J Virol* **87**:3108-3118.
- 726 34. **Gao H, Sun Y, Hu J, Qi L, Wang J, Xiong X, Wang Y, He Q, Lin Y, Kong W,**  
727 **Seng LG, Sun H, Pu J, Chang KC, Liu X, Liu J.** 2015. The contribution of PA-X to  
728 the virulence of pandemic 2009 H1N1 and highly pathogenic H5N1 avian influenza  
729 viruses. *Sci Rep* **5**:8262.
- 730 35. **Hu J, Mo Y, Wang X, Gu M, Hu Z, Zhong L, Wu Q, Hao X, Hu S, Liu W, Liu H,**  
731 **Liu X, Liu X.** 2015. PA-X decreases the pathogenicity of highly pathogenic H5N1  
732 influenza A virus in avian species by inhibiting virus replication and host response. *J*  
733 *Virol* **89**:4126-4142.
- 734 36. **Hayashi T, MacDonald LA, Takimoto T.** 2015. Influenza A Virus Protein PA-X  
735 Contributes to Viral Growth and Suppression of the Host Antiviral and Immune  
736 Responses. *J Virol* **89**:6442-6452.
- 737 37. **Lee J, Yu H, Li Y, Ma J, Lang Y, Duff M, Henningson J, Liu Q, Li Y, Nagy A,**  
738 **Bawa B, Li Z, Tong G, Richt JA, Ma W.** 2017. Impacts of different expressions of  
739 PA-X protein on 2009 pandemic H1N1 virus replication, pathogenicity and host  
740 immune responses. *Virology* **504**:25-35.

- 741 38. **Hu J, Mo Y, Gao Z, Wang X, Gu M, Liang Y, Cheng X, Hu S, Liu W, Liu H,**  
742 **Chen S, Liu X, Peng D, Liu X.** 2016. PA-X-associated early alleviation of the acute  
743 lung injury contributes to the attenuation of a highly pathogenic H5N1 avian  
744 influenza virus in mice. *Med Microbiol Immunol* **205**:381-395.
- 745 39. **Gao H, Sun H, Hu J, Qi L, Wang J, Xiong X, Wang Y, He Q, Lin Y, Kong W,**  
746 **Seng LG, Pu J, Chang KC, Liu X, Liu J, Sun Y.** 2015. Twenty amino acids at the  
747 C-terminus of PA-X are associated with increased influenza A virus replication and  
748 pathogenicity. *J Gen Virol* **96**:2036-2049.
- 749 40. **Gao H, Xu G, Sun Y, Qi L, Wang J, Kong W, Sun H, Pu J, Chang KC, Liu J.**  
750 2015. PA-X is a virulence factor in avian H9N2 influenza virus. *J Gen Virol* **96**:2587-  
751 2594.
- 752 41. **Nogales A, Rodriguez L, DeDiego ML, Topham DJ, Martinez-Sobrido L.** 2017.  
753 Interplay of PA-X and NS1 Proteins in Replication and Pathogenesis of a  
754 Temperature-Sensitive 2009 Pandemic H1N1 Influenza A Virus. *J Virol* **91**:e00720-  
755 00717.
- 756 42. **Xu G, Zhang X, Liu Q, Bing G, Hu Z, Sun H, Xiong X, Jiang M, He Q, Wang Y,**  
757 **Pu J, Guo X, Yang H, Liu J, Sun Y.** 2017. PA-X protein contributes to virulence of  
758 triple-reassortant H1N2 influenza virus by suppressing early immune responses in  
759 swine. *Virology* **508**:45-53.
- 760 43. **Naffakh N, Massin P, van der Werf S.** 2001. The transcription/replication activity  
761 of the polymerase of influenza A viruses is not correlated with the level of proteolysis  
762 induced by the PA subunit. *Virology* **285**:244-252.
- 763 44. **Hayashi T, Chaimayo C, McGuinness J, Takimoto T, Abdel-Wahab M.** 2016.  
764 Critical Role of the PA-X C-Terminal Domain of Influenza A Virus in Its Subcellular  
765 Localization and Shutoff Activity. *Journal of Virology* **90**:7131-7141.
- 766 45. **Khaperskyy DA, Schmalings S, Larkins-Ford J, McCormick C, Gaglia MM.**  
767 2016. Selective Degradation of Host RNA Polymerase II Transcripts by Influenza A  
768 Virus PA-X Host Shutoff Protein. *PLoS Pathog* **12**:e1005427.
- 769 46. **Oishi K, Yamayoshi S, Kawaoka Y.** 2015. Mapping of a Region of the PA-X  
770 Protein of Influenza A Virus That Is Important for Its Shutoff Activity. *J Virol*  
771 **89**:8661-8665.
- 772 47. **Firth AE, Jagger BW, Wise HM, Nelson CC, Parsawar K, Wills NM, Naphthine**  
773 **S, Taubenberger JK, Digard P, Atkins JF.** 2012. Ribosomal frameshifting used in  
774 influenza A virus expression occurs within the sequence UCC\_UUU\_CGU and is in  
775 the +1 direction. *Open Biol* **2**:120109.
- 776 48. **Abernathy E, Clyde K, Yeasmin R, Krug LT, Burlingame A, Coscoy L,**  
777 **Glaunsinger B.** 2014. Gammaherpesviral gene expression and virion composition are  
778 broadly controlled by accelerated mRNA degradation. *PLoS Pathog* **10**:e1003882.
- 779 49. **Abt M, de Jonge J, Laue M, Wolff T.** 2011. Improvement of H5N1 influenza  
780 vaccine viruses: influence of internal gene segments of avian and human origin on  
781 production and hemagglutinin content. *Vaccine* **29**:5153-5162.
- 782 50. **Harvey R, Wheeler JX, Wallis CL, Robertson JS, Engelhardt OG.** 2008.  
783 Quantitation of haemagglutinin in H5N1 influenza viruses reveals low  
784 haemagglutinin content of vaccine virus NIBRG-14 (H5N1). *Vaccine* **26**:6550-6554.
- 785 51. **Kamal RP, Alymova IV, York IA.** 2017. Evolution and Virulence of Influenza A  
786 Virus Protein PB1-F2. *Int J Mol Sci* **19**:96.
- 787 52. **Khaperskyy DA, Emara MM, Johnston BP, Anderson P, Hatchette TF,**  
788 **McCormick C.** 2014. Influenza a virus host shutoff disables antiviral stress-induced  
789 translation arrest. *PLoS Pathog* **10**:e1004217.

- 790 53. **Newton AH, Cardani A, Braciale TJ.** 2016. The host immune response in  
791 respiratory virus infection: balancing virus clearance and immunopathology. *Semin*  
792 *Immunopathol* **38**:471-482.
- 793 54. **Klenk HD, Garten W, Matrosovich M.** 2011. Molecular mechanisms of  
794 interspecies transmission and pathogenicity of influenza viruses: Lessons from the  
795 2009 pandemic. *Bioessays* **33**:180-188.
- 796 55. **Baigent SJ, McCauley JW.** 2003. Influenza type A in humans, mammals and birds:  
797 determinants of virus virulence, host-range and interspecies transmission. *Bioessays*  
798 **25**:657-671.
- 799 56. **Benton DJ, Martin SR, Wharton SA, McCauley JW.** 2015. Biophysical  
800 measurement of the balance of influenza a hemagglutinin and neuraminidase  
801 activities. *J Biol Chem* **290**:6516-6521.
- 802 57. **Matrosovich M, Matrosovich T, Carr J, Roberts NA, Klenk HD.** 2003.  
803 Overexpression of the alpha-2,6-sialyltransferase in MDCK cells increases influenza  
804 virus sensitivity to neuraminidase inhibitors. *J Virol* **77**:8418-8425.
- 805 58. **Moscovici C, Moscovici MG, Jimenez H, Lai MM, Hayman MJ, Vogt PK.** 1977.  
806 Continuous tissue culture cell lines derived from chemically induced tumors of  
807 Japanese quail. *Cell* **11**:95-103.
- 808 59. **de Wit E, Spronken MI, Bestebroer TM, Rimmelzwaan GF, Osterhaus AD,**  
809 **Fouchier RA.** 2004. Efficient generation and growth of influenza virus A/PR/8/34  
810 from eight cDNA fragments. *Virus Res* **103**:155-161.
- 811 60. **Brookes DW, Miah S, Lackenby A, Hartgroves L, Barclay WS.** 2011. Pandemic  
812 H1N1 2009 influenza virus with the H275Y oseltamivir resistance neuraminidase  
813 mutation shows a small compromise in enzyme activity and viral fitness. *J*  
814 *Antimicrob Chemother* **66**:466-470.
- 815 61. **Howard W, Hayman A, Lackenby A, Whiteley A, Londt B, Banks J, McCauley**  
816 **J, Barclay W.** 2007. Development of a reverse genetics system enabling the rescue of  
817 recombinant avian influenza virus A/Turkey/England/50-92/91 (H5N1). *Avian Dis*  
818 **51**:393-395.
- 819 62. **Turnbull ML, Wise HM, Nicol MQ, Smith N, Dunfee RL, Beard PM, Jagger**  
820 **BW, Ligertwood Y, Hardisty GR, Xiao H, Benton DJ, Coburn AM, Paulo JA,**  
821 **Gygi SP, McCauley JW, Taubenberger JK, Lycett SJ, Weekes MP, Dutia BM,**  
822 **Digard P.** 2016. Role of the B Allele of Influenza A Virus Segment 8 in Setting  
823 Mammalian Host Range and Pathogenicity. *J Virol* **90**:9263-9284.
- 824 63. **Bourret V, Croville G, Mariette J, Klopp C, Bouchez O, Tiley L, Guérin J-L.**  
825 2013. Whole-genome, deep pyrosequencing analysis of a duck influenza A virus  
826 evolution in swine cells. *Infection, Genetics and Evolution* **18**:31-41.
- 827 64. **Chen BJ, Leser GP, Jackson D, Lamb RA.** 2008. The influenza virus M2 protein  
828 cytoplasmic tail interacts with the M1 protein and influences virus assembly at the site  
829 of virus budding. *J Virol* **82**:10059-10070.
- 830 65. **Ping J, Dankar SK, Forbes NE, Keleta L, Zhou Y, Tyler S, Brown EG.** 2010. PB2  
831 and Hemagglutinin Mutations Are Major Determinants of Host Range and Virulence  
832 in Mouse-Adapted Influenza A Virus. *Journal of Virology* **84**:10606-10618.
- 833 66. **Long JS, Giotis ES, Moncorge O, Frise R, Mistry B, James J, Morisson M, Iqbal**  
834 **M, Vignal A, Skinner MA, Barclay WS.** 2016. Species difference in ANP32A  
835 underlies influenza A virus polymerase host restriction. *Nature* **529**:101-104.
- 836 67. **Robertson JS, Engelhardt OG.** 2010. Developing vaccines to combat pandemic  
837 influenza. *Viruses* **2**:532-546.
- 838 68. **Noton SL, Medcalf E, Fisher D, Mullin AE, Elton D, Digard P.** 2007.  
839 Identification of the domains of the influenza A virus M1 matrix protein required for

- 840 NP binding, oligomerization and incorporation into virions. *J Gen Virol* **88**:2280-  
841 2290.
- 842 69. **Blok V, Cianci C, Tibbles KW, Inglis SC, Krystal M, Digard P.** 1996. Inhibition  
843 of the influenza virus RNA-dependent RNA polymerase by antisera directed against  
844 the carboxy-terminal region of the PB2 subunit. *J Gen Virol* **77**:1025-1033.
- 845 70. **Poole E, Elton D, Medcalf L, Digard P.** 2004. Functional domains of the influenza  
846 A virus PB2 protein: identification of NP- and PB1-binding sites. *Virology* **321**:120-  
847 133.
- 848 71. **Klimov A, Balish A, Veguilla V, Sun H, Schiffer J, Lu X, Katz JM, Hancock K.**  
849 2012. Influenza virus titration, antigenic characterization, and serological methods for  
850 antibody detection. *Methods Mol Biol* **865**:25-51.
- 851
- 852

853 **Figures**

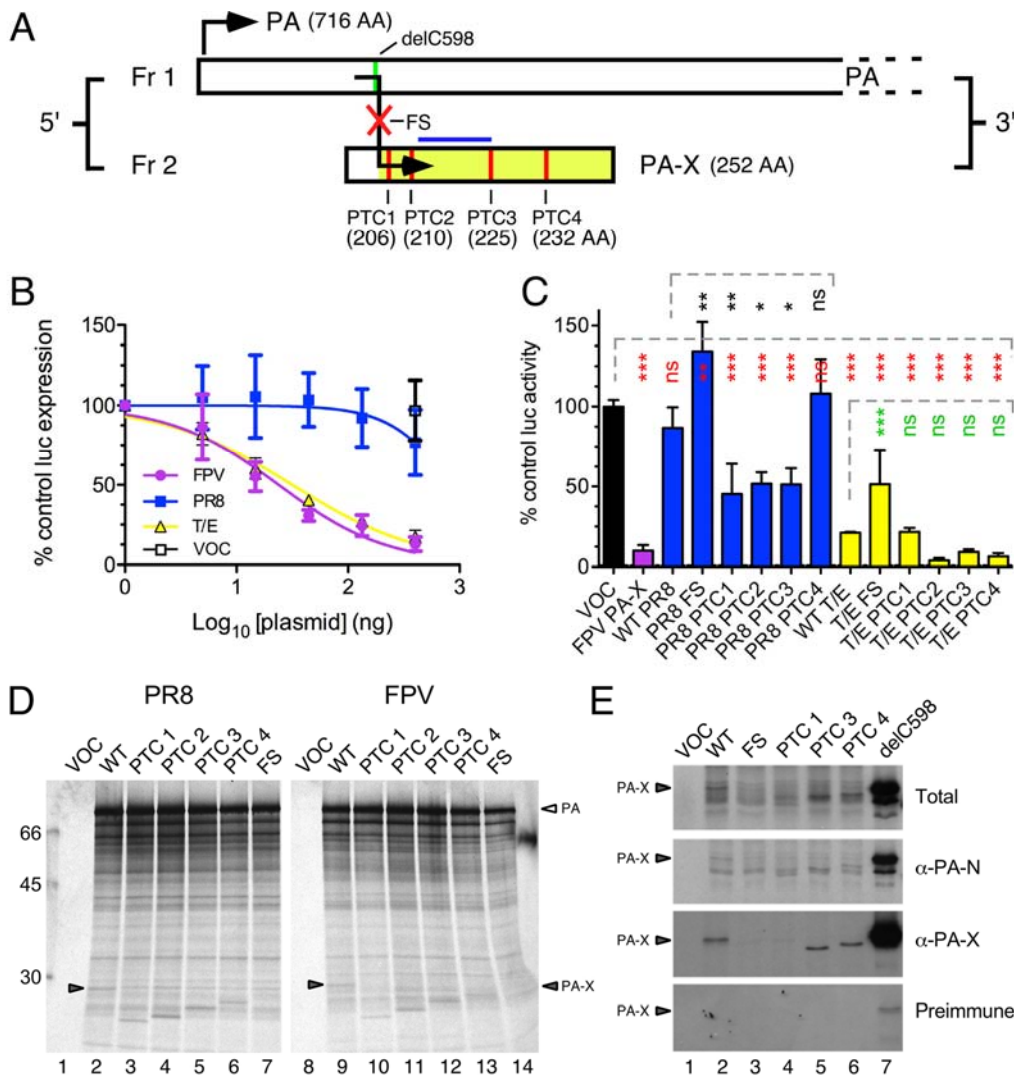

854  
 855 **FIGURE 1. Virus strain dependent variation in PA-X-mediated host cell shut-off**  
 856 **activity.** **A)** Schematic showing mutations in segment 3: at the frameshift (FS) site to generate a PA-X null  
 857 virus, or in the X-ORF so that segment 3 expresses C-terminally truncated versions of PA-X (PTCs 1-4, size of  
 858 products indicated), or removing cytosine 598 (delC598) to place the X ORF in frame with PA such that only  
 859 PA-X is expressed. **B, C)** PA-X-mediated inhibition of cellular RNA polymerase II-driven gene expression in  
 860 QT-35 cells. **B)** Cells were co-transfected with 100 ng of pRL plasmid constitutively expressing *Renilla*  
 861 luciferase and a dilution series of the indicated segment 3 pHW2000 plasmids or with a fixed amount of the  
 862 empty pHW2000 vector (VOC). Luciferase activity was measured 48 h later and plotted as % of a pRL only  
 863 sample. Dose-inhibition curves were fitted using GraphPad Prism software. Data are mean  $\pm$  SD of two  
 864 independent experiments each performed in triplicate. **C)** Cells were co-transfected with 100 ng of pRL plasmid  
 865 and 400 ng of effector pHW2000 plasmids expressing segment 3 products. Luciferase activity was measured 48  
 866 h later and plotted as the % of a pHW2000 vector only control. Data are the mean  $\pm$  SD from 2 independent  
 867 experiments performed in duplicate. Dashed lines indicate groups of statistical tests (against the left hand bar in  
 868 each case; \*  $p < 0.05$ , \*\*  $p < 0.01$ , \*\*\*  $p < 0.001$ ) as assessed by Dunnett's test. **D, E)** *In vitro* translation of PA-X  
 869 from PR8 segment 3 constructs. Aliquots of rabbit reticulocyte lysate supplemented with <sup>35</sup>S-methionine were  
 870 programmed with the indicated plasmids and radiolabelled polypeptides visualised by SDS-PAGE and  
 871 autoradiography before **(D)** or after **(E)** immunoprecipitation with the indicated antisera. Arrowheads in **(D)**  
 872 indicate full length PA-X while molecular mass (kDa) markers are shown on the left.  
 873

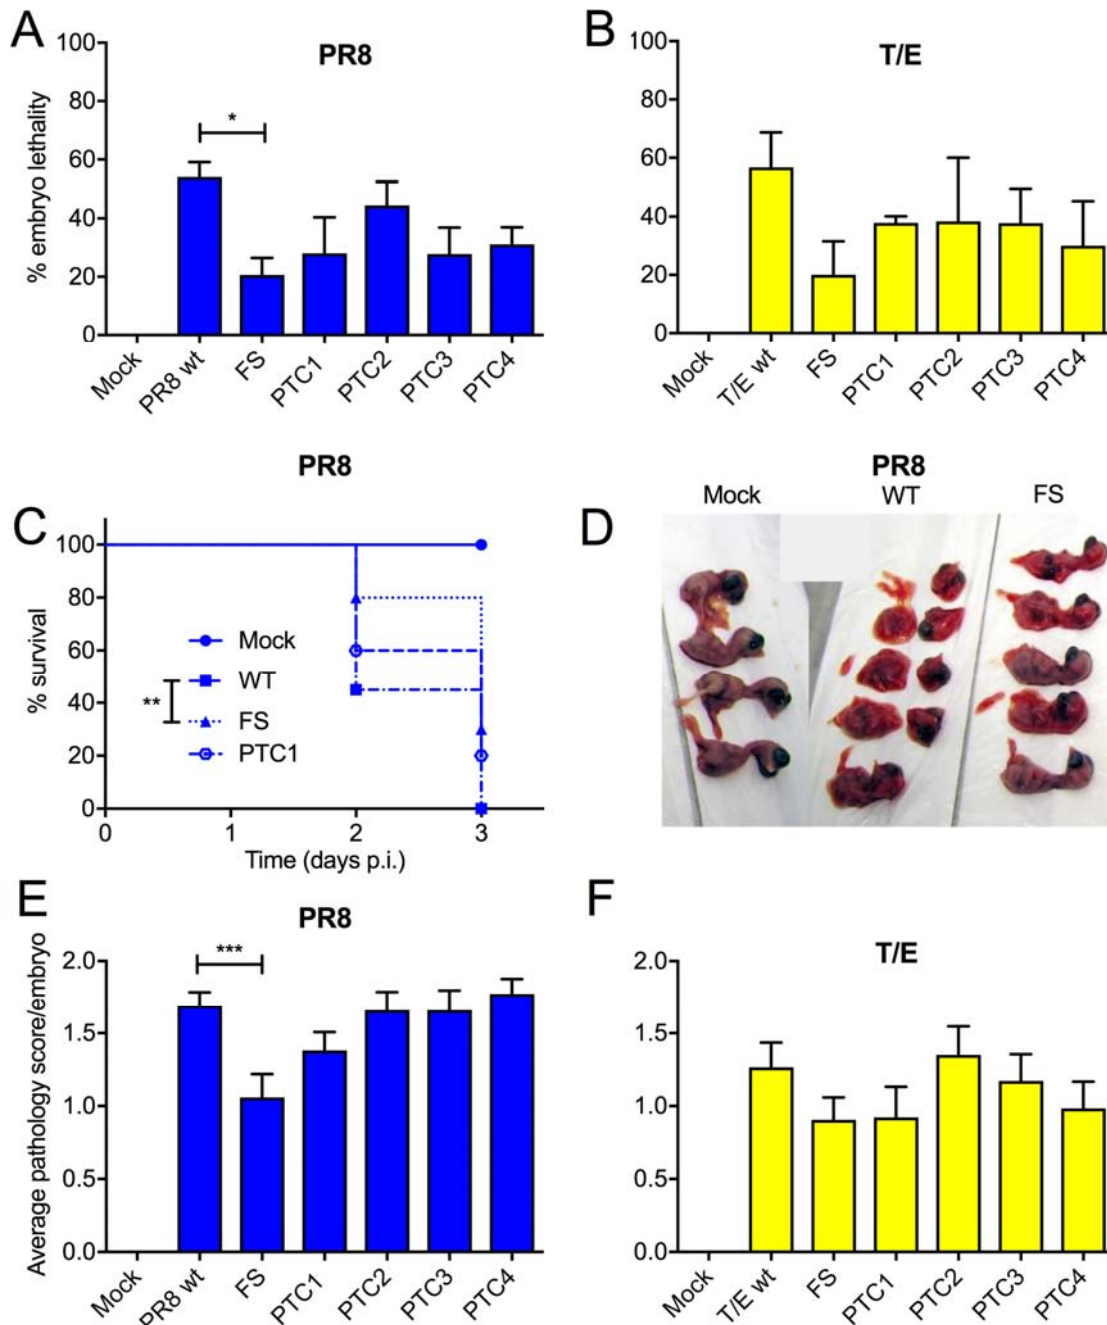

874  
875  
876  
877  
878  
879  
880  
881  
882  
883  
884  
885

**FIGURE 2. Effect of PA-X mutations in a chick embryo pathogenicity model.** Groups of 5-6 embryonated hens' eggs were infected with 1000 PFU of the indicated viruses and **A, B**) embryo viability was determined by candling at 2 days p.i. Data are plotted as mean  $\pm$  SEM % embryo lethality from 3-4 independent experiments. Horizontal bars indicate statistical significance (\*  $p < 0.05$ ) as assessed by Dunnett's test. **C**) Infected eggs were monitored daily for embryo viability and survival was plotted versus time. Data are from 3 independent experiments with 5 - 10 eggs per experiment. Statistical significance between WT and FS viruses (\*\*  $p < 0.01$ ) was assessed by log-rank (Mantel-Cox) test. **D-F**) From the experiments described in **A**) and **B**), embryos were imaged **D**) and **E, F**) scored blind by two observers as 0 = normal, 1 = intact but bloody, 2 = small, damaged and with severe haemorrhages. Data are the average  $\pm$  SEM pathology scores from 3-4 independent experiments. Horizontal bar indicates statistical significance (\*\*\*)  $p < 0.001$ ) as assessed by Dunnett's test.



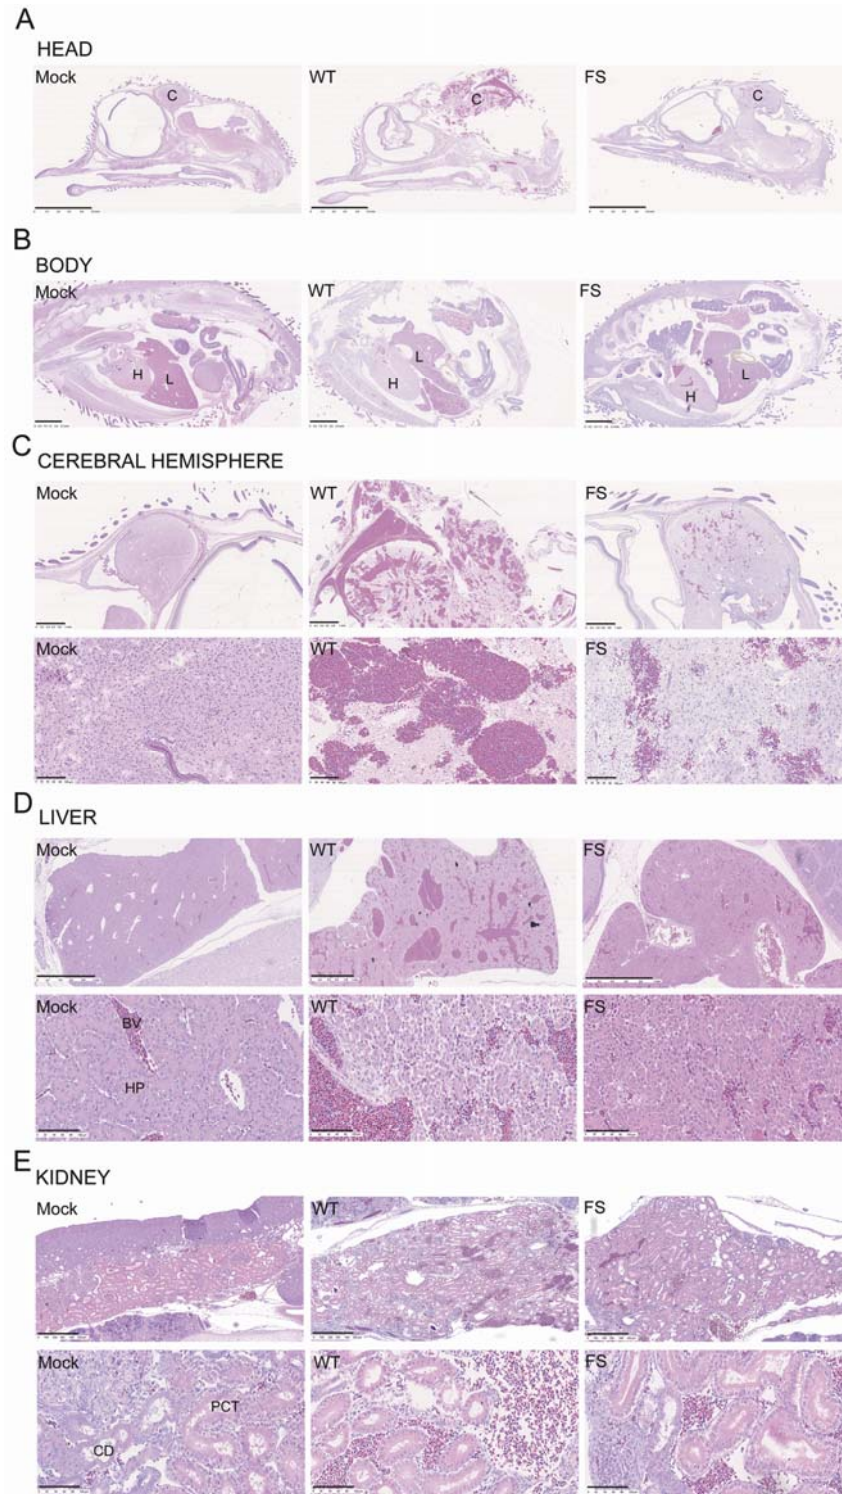

886  
887  
888  
889  
890  
891  
892  
893  
894

**FIGURE 3. Histopathology of chick embryos following infection with PR8 viruses.** Embryonated hens' eggs were infected with segment 3 WT or mutant viruses or mock infected. 2 days p.i. embryos were fixed, sectioned and stained with H&E before imaging with a Nanozoomer XR (Hamamatsu) using brightfield settings; representative pictures are shown: **A)** head, scale bar = 5 mm, and **B)** body, scale bar = 2.5 mm, and **C)** cerebral hemisphere, **D)** liver and **E)** kidney, scale bars for low and high magnification images = 1mm and 100  $\mu$ m or 500  $\mu$ m, respectively. C = cerebral hemisphere, H = heart, L = liver, PCT = proximal convoluted tubule, CD = collecting duct, HP=hepatocytes, BV= blood vessel).

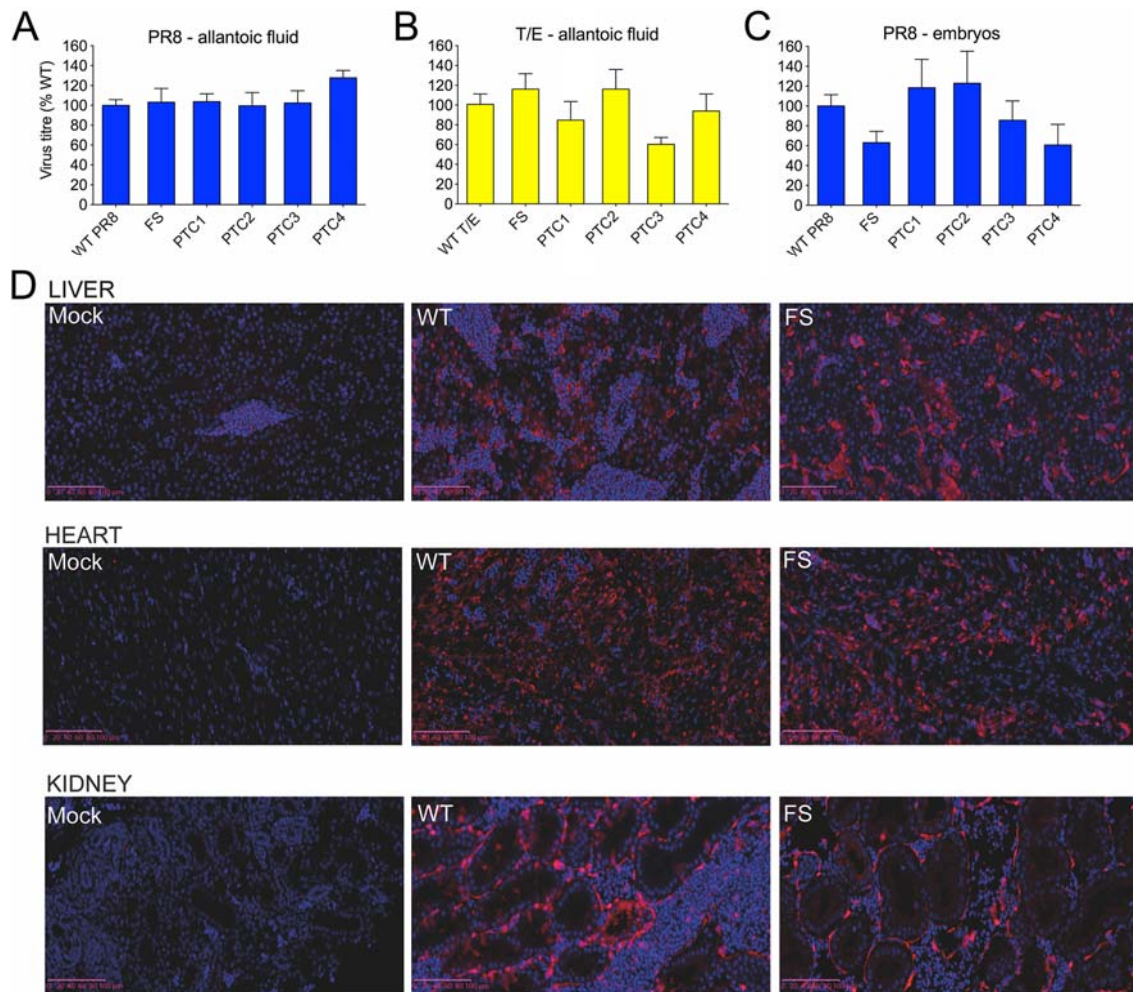

895

896

897 **FIGURE 4. Effects of mutating PA-X expression on virus replication in chick embryos.**

898 Groups of 5-6 embryonated hens' eggs were infected with the indicated viruses and at 2 days p.i., virus titres  
899 determined by plaque assay from (A, B) allantoic fluid or (C) washed and macerated chick embryos. Graphs  
900 represent the mean  $\pm$  SEM from 3 (A, B) or 2-4 independent experiments (C). Titres of mutant viruses were not  
901 significantly different compared to WT virus (Dunnett's test). (D) Embryos were fixed at 2 days p.i., sectioned  
902 and stained for IAV NP and DNA before imaging using a Nanozoomer XR (Hamamatsu) on fluorescence  
903 settings. Representative images of liver, heart and kidney are shown. Scale bars = 100  $\mu$ m. NP = red, DAPI =  
904 blue.

905

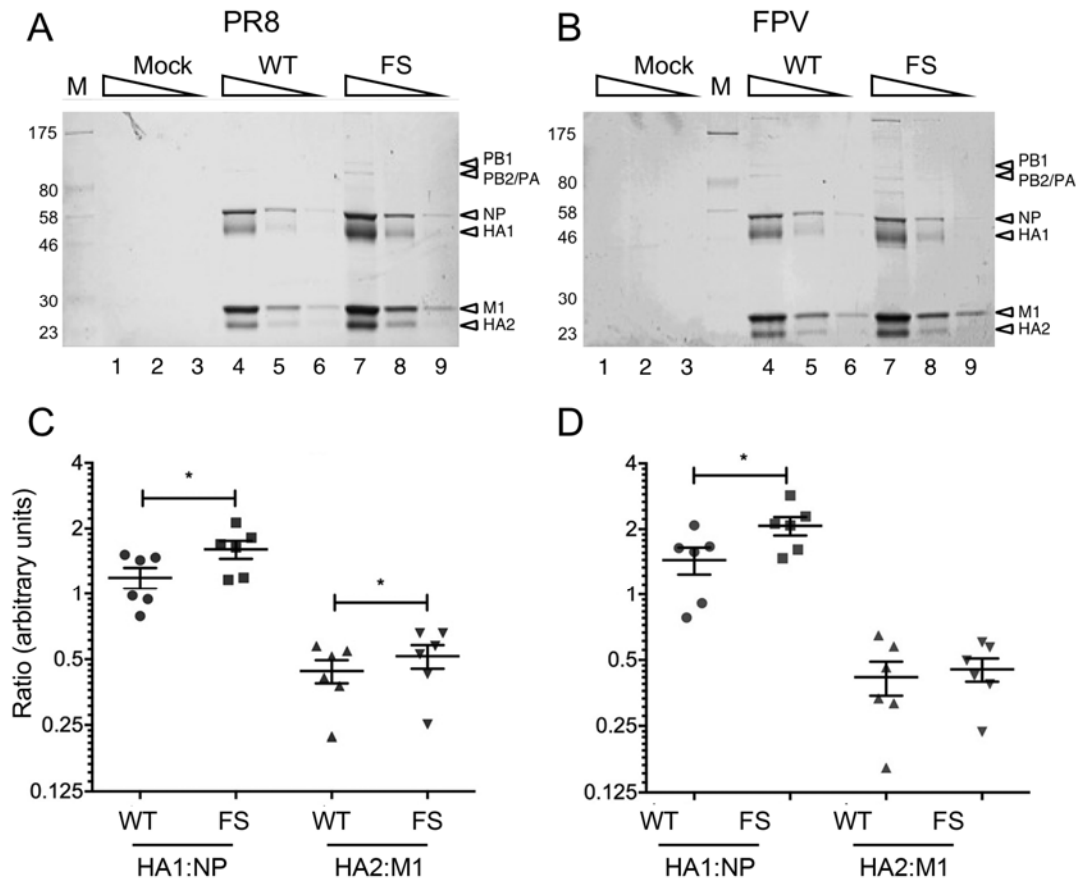

906  
 907  
 908  
 909  
 910  
 911  
 912  
 913  
 914

**FIGURE 5. Virion composition of WT or FS mutant viruses.** Embryonated hens' eggs were infected with WT or segment 3 mutant viruses or mock infected. At 2 days p.i., virus was purified from allantoic fluid by sucrose density gradient ultracentrifugation and 3-fold serial dilutions **A, B**) analysed by SDS-PAGE on 10% polyacrylamide gels and staining with Coomassie blue. **C, D**) For PR8 and FPV, respectively, the ratios of NP:HA1 and M1:HA2 were determined by densitometry of SDS-PAGE gels. Scatter plots with the mean and SEM of 6 measurements from 3 independent experiments using 2 independently rescued virus stocks are shown. Horizontal bars indicate statistical significance (\*  $p < 0.05$ ) as assessed by paired t-test.

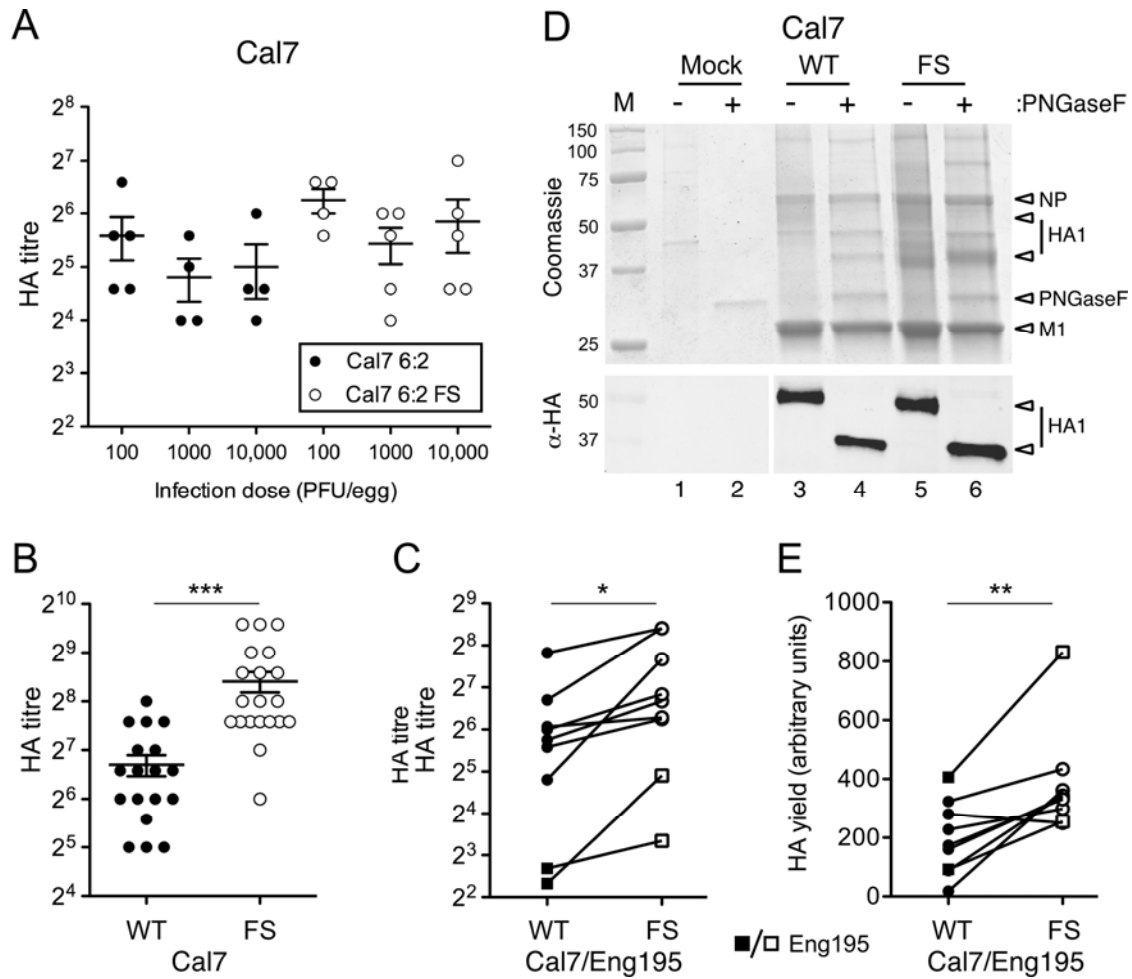

915  
916

917 **FIGURE 6. Effect of the PA-X FS mutation on HA yield of A(H1N1) pdm09 CVV**  
 918 **mimics.** Embryonated hens' eggs were infected as indicated and **A-C)** HA titres in allantoic fluid measured at  
 919 3 days post-infection for (A) groups of 5 or (B) 20 eggs per condition. (A, B) Scatter plots of titres from  
 920 individual eggs with mean and SEM are shown. (\*\*\*)  $p < 0.001$  assessed by unpaired t-test. C) Average HA  
 921 titres from groups of eggs inoculated at the infection dose which gave maximum yield are shown as paired  
 922 observations. Statistical significance ( $* p < 0.05$ ,  $n=9$ ) assessed by paired t-test. **D, E)** Allantoic fluid was  
 923 clarified and virus pelleted by ultracentrifugation through 30% sucrose pads. Equal volumes of resuspended  
 924 virus pellets were separated by SDS-PAGE on a 12% polyacrylamide gel and visualized by (D) staining with  
 925 Coomassie blue (upper panel) or western blot for HA1 (lower panel) with (+) or without (-) prior treatment with  
 926 PNGase F. Molecular mass (kDa) markers and specific polypeptides are labelled. **E)** De-glycosylated HA1 yield  
 927 was quantified by densitometry of the western blots. Data points represent 8 independent experiments using 3  
 928 independently rescued RG virus stocks shown as paired observations. (\*\*  $p < 0.01$ ,  $n=8$ ) as assessed by paired t-  
 929 test. Circles represent Cal7 and squares represent Eng195 CVV mimics.

930 **TABLE 1. Effects of the  $\Delta$ PA-X FS mutation on HA yield of CVVs grown in eggs.**

| Lineage       | Subtype | Strain                                       | No. of independent rescues | HA titre 6:2 virus <sup>a</sup> | HA titre 6:2FS virus | Relative <sup>b</sup> HA titre | Relative <sup>b</sup> HA1 yield | No. of expts. | Small scale | Large scale |
|---------------|---------|----------------------------------------------|----------------------------|---------------------------------|----------------------|--------------------------------|---------------------------------|---------------|-------------|-------------|
| Human pdm2009 | H1N1    | A/California/07/2009                         | 2                          | 106 ± 86.6                      | 249 ± 109            | 2.65 ± 2.16                    | 1.9 ± 1.07 <sup>c</sup>         | 7             | 4           | 3           |
| Human pdm2009 | H1N1    | A/California/07/2009 chimeric HA (NIBRG-119) | 1                          | -                               | -                    | -                              | 1.54 ± 0.43                     | 2             | 1           | 1           |
| Human pdm2009 | H1N1    | A/England/195/2009                           | 1                          | 5.71 ± 0.71                     | 20.1 ± 9.92          | 3.79 ± 2.21                    | 2.4 ± 0.37                      | 2             | 1           | 1           |
| Human pdm1968 | H3N2    | A/Udorn/307/72                               | 2                          | 2200 ± 929                      | 2100 ± 720           | 1.26 ± 0.47                    | 1.35 ± 0.36                     | 5             | 3           | 2           |
| Human pdm1968 | H3N2    | A/Hong Kong/1/68                             | 1                          | 801 ± 117                       | 843 ± 140            | 1.05 ± 0.06                    | 1.22 ± 0.39                     | 3             | 2           | 1           |
| Avian         | H7N3    | A/mallard/Netherlands/12/2000 (NIBRG-60)     | 2                          | 33.5 ± 29.1                     | 45.0 ± 36.9          | 1.34 ± 0.18                    | 1.55 ± 0.14                     | 5             | 3           | 2           |
| Avian         | H5N1    | A/turkey/Turkey/1/2005/1/2005 (NIBRG-23)     | 2                          | 47.1 ± 27.3                     | 48.8 ± 23.2          | 1.13 ± 0.23                    | 1.10 ± 0.30                     | 5             | 3           | 2           |
| Avian         | H1N1    | A/mallard/Netherlands/10/99                  | 2                          | 123 ± 59                        | 128 ± 37             | 1.22 ± 0.37                    | 1.13 ± 0.36                     | 5             | 4           | 1           |
| Avian         | H9N2    | A/chicken/Pakistan/UDL-01/2008               | 2                          | 302 ± 364                       | 312 ± 264            | 0.92 ± 0.30                    | 1.01 ± 0.18                     | 4             | 2           | 2           |

931  
932  
933  
934  
935  
936

<sup>a</sup>Values are mean ± SD.

<sup>b</sup>Relative means the ratio of the average HA titres (of eggs incubated at 35°C) or HA1 yield of FS ( $\Delta$  PA-X) viruses to their WT counterparts

<sup>c</sup>An outlier from one experiment was ignored when taking the average.
